1  
2  
3  
4  
5  
6  
7  
8  
9  
10  
11  
12  
13  
14  
15  
16  
17  
18  
19  
20  
21  
22  
23  
24  
25  
26  
27  
28  
29  
30  
31  
32  
33  
34  
35  
36  
37  
38  
39  
40  
41  
42  
43  
44  
45  
46  
47  
48  
49

## Nuclear SUN1 Stabilizes Endothelial Cell Junctions via Microtubules to Regulate Blood Vessel Formation

Danielle B Buglak<sup>a</sup>, Molly R Kulikauskas<sup>a</sup>, Ziqing Liu<sup>b</sup>, Ariel L Gold<sup>b</sup>, Allison P Marvin<sup>b</sup>, Andrew Burciu<sup>b</sup>, Natalie T Tanke<sup>a</sup>, Shea N Ricketts<sup>c</sup>, Karina Kinghorn<sup>a</sup>, Morgan Oatley<sup>b</sup>, Bryan N Johnson<sup>b</sup>, Pauline Bougaran<sup>b</sup>, Celia E Shiau<sup>b</sup>, Stephen L Rogers<sup>b</sup>, and Victoria L Bautch<sup>a,b,d,#</sup>

<sup>a</sup>Curriculum in Cell Biology and Physiology, The University of North Carolina at Chapel Hill, Chapel Hill, North Carolina 27599, USA.

<sup>b</sup>Department of Biology, The University of North Carolina at Chapel Hill, Chapel Hill, North Carolina 27599, USA.

<sup>c</sup>Department of Pathology, The University of North Carolina at Chapel Hill, Chapel Hill, North Carolina 27599, USA.

<sup>d</sup>McAllister Heart Institute, The University of North Carolina at Chapel Hill, Chapel Hill, North Carolina 27599, USA

#Corresponding author: Victoria L Bautch, PhD  
Professor of Biology  
Department of Biology, CB#3280  
University of North Carolina at Chapel Hill  
Chapel Hill, NC 27599 USA  
E-mail: bautch@med.unc.edu

Running head: SUN1 Regulates Endothelial Junctions and Angiogenesis

Abstract: 206 words

Text: 47,835 characters with spaces (including figure legends; excluding methods, references, and supplement)

Figures: 7 main, 8 supplemental, 6 movies

References: 113

50 **SUMMARY**

51 The nuclear membrane protein SUN1 promotes blood vessel formation and barrier  
52 function by stabilizing endothelial cell-cell junctions. Communication between SUN1 and  
53 endothelial cell junctions relies upon proper microtubule dynamics and Rho signaling far  
54 from the nucleus, revealing long-range cellular communication from the nucleus to the  
55 cell periphery that is important for vascular development and function.

56

57 **ABSTRACT**

58  
59 Endothelial cells line all blood vessels, where they coordinate blood vessel formation  
60 and the blood-tissue barrier via regulation of cell-cell junctions. The nucleus also  
61 regulates endothelial cell behaviors, but it is unclear how the nucleus contributes to  
62 endothelial cell activities at the cell periphery. Here we show that the nuclear-localized  
63 LINC complex protein SUN1 regulates vascular sprouting and barrier function via  
64 effects on endothelial cell-cell junction morphology and function. Loss of murine  
65 endothelial *Sun1* impaired blood vessel formation and destabilized junctions, angiogenic  
66 sprouts formed but retracted in SUN1-depleted sprouts, and zebrafish vessels lacking  
67 Sun1b had aberrant junctions and defective cell-cell connections. At the cellular level,  
68 SUN1 stabilized endothelial cell-cell junctions, promoted barrier function, and regulated  
69 contractility. Mechanistically, SUN1 depletion altered cell behaviors via the cytoskeleton  
70 without changing transcriptional profiles. Reduced peripheral microtubule density, fewer  
71 junction contacts and increased catastrophes accompanied SUN1 loss, and microtubule  
72 depolymerization phenocopied effects on junctions. Depletion of GEF-H1, a  
73 microtubule-regulated Rho activator, or the LINC complex protein nesprin-1 rescued  
74 defective junctions of SUN1-depleted endothelial cells. Thus, endothelial SUN1  
75 regulates peripheral cell-cell junctions from the nucleus via LINC complex-based  
76 microtubule interactions that affect peripheral microtubule dynamics and Rho-regulated  
77 contractility, and this long-range regulation is important for proper blood vessel  
78 sprouting and barrier function.

79

80 **Keywords:** Endothelial cell, SUN1, LINC, nucleus, junctions, angiogenesis, microtubules,  
81 contractility, Rho, GEF-H1, nesprin-1

82 **INTRODUCTION**

83           Blood vessels form and expand via sprouting angiogenesis, a dynamic process  
84 whereby endothelial cells migrate from pre-existing vessels to form new conduits  
85 (Carmeliet & Jain, 2011; Wacker & Gerhardt, 2011; Kushner & Bautch, 2013; Bautch &  
86 Caron, 2015). During angiogenesis, endothelial cell-cell junctions destabilize and  
87 rearrange to allow for repolarization and migration towards pro-angiogenic cues (Esser  
88 et al., 1998; Dejana, 2004; Blum et al., 2008). Specifically, the endothelial cell adherens  
89 junction protein VE-cadherin is required for vascular sprouting and viability (Carmeliet et  
90 al., 1999; Montero-Balaguer et al., 2009; Sauter et al., 2014; Szymborska & Gerhardt,  
91 2018). As vessels mature, endothelial cell junctions stabilize and form a functional  
92 barrier that regulates egress of fluid and oxygen; barrier dysfunction leads to increased  
93 permeability and severe disease (Claesson-Welsh, 2015; Rho et al., 2017; Claesson-  
94 Welsh et al., 2021). Thus, regulation of endothelial cell junction stability is important  
95 developmentally and for vascular homeostasis.

96

97           Adherens junctions are key to integrating and regulating both external and  
98 internal cellular inputs from multiple sources, including the microtubule and actin  
99 cytoskeletons (Ligon et al., 2001; Shaw et al., 2007; Bellett et al., 2009; Dejana &  
100 Vestweber, 2013; Abu Taha & Schnittler, 2014). For example, increased actomyosin  
101 contractility destabilizes endothelial cell adherens junctions, and disorganized junctional  
102 actin accompanies VE-cadherin loss (Huveneers et al., 2012; Sauter et al., 2014;  
103 Angulo-Urarte et al., 2018). VE-cadherin loss also changes microtubule dynamics, and  
104 disruption of microtubule dynamics destabilizes junctions and barrier function  
105 (Komarova et al., 2012). Coordination of inputs from the actin and microtubule  
106 cytoskeletons regulates endothelial cell barrier integrity and sprouting dynamics via

107 small GTPases (Birukova et al., 2006; Mavria et al., 2006; Sehrawat et al., 2008, 2011;  
108 Wimmer et al., 2012; Szyborska & Gerhardt, 2018). In particular, RhoA signaling is  
109 regulated by microtubules via GEF-H1, a RhoGEF that is inactive while bound to  
110 microtubules and activated upon release, leading to RhoA activation, increased  
111 actomyosin contractility, and changes to endothelial cell barrier function (Krendel et al.,  
112 2002; Birukova et al., 2006; Birkenfeld et al., 2008). However, how the endothelial cell  
113 nucleus affects these processes is poorly understood.

114

115         The nucleus is usually found far from the cell periphery and junctions, yet it is  
116 important for functions critical to angiogenesis and vascular remodeling, such as  
117 polarity, migration, and mechanotransduction (Tkachenko et al., 2013; Guilluy et al.,  
118 2014; Graham et al., 2018), and perturbations of some nuclear membrane proteins  
119 affect transcriptional profiles (Li et al., 2017; May & Carroll, 2018; Carley et al., 2021).  
120 The linker of the nucleoskeleton and cytoskeleton (LINC) complex is comprised of both  
121 SUN (Sad1p, UNC-84) and KASH (Klarsicht, ANC-1, Syne/Nesprin Homology) proteins  
122 (Starr & Fridolfsson, 2010) that function as a bridge between the nucleus and the  
123 cytoskeleton, and also link through subnuclear lamin filaments to chromatin (Haque et  
124 al., 2006). SUN proteins localize to the inner nuclear membrane and bind KASH  
125 proteins, or nesprins, from their C-terminus and lamins at their N-terminus, thus  
126 providing a structural link from the nuclear cortex to the cellular cytoskeleton  
127 (Padmakumar et al., 2005; Haque et al., 2006; McGee et al., 2006; Stewart-Hutchinson  
128 et al., 2008). Nesprins are long spectrin-rich proteins localized to the outer nuclear  
129 envelope that bind SUN proteins via their C-terminus while N-terminally interacting  
130 indirectly with microtubules (via various motor proteins such as dynein and kinesin) and  
131 intermediate filaments (via plectins), and directly with actin via calponin homology

132 domains (Ketema et al., 2007; Meyerzon et al., 2009; Zhang et al., 2009; Fridolfsson et  
133 al., 2010; Starr & Fridolfsson, 2010). Two mammalian SUN proteins are ubiquitously  
134 expressed, and based on functional consequences of SUN manipulations it has been  
135 posited that SUN1 regulates microtubule-based functions while SUN2 coordinates actin  
136 regulation (Zhu et al., 2017). However, *in vitro* binding studies do not reveal a SUN-  
137 nesprin specificity to account for this bias (Stewart-Hutchinson et al., 2008; Ostlund et  
138 al., 2009), so how complexes are assembled and sorted in cells is unclear. It is well-  
139 established that the LINC complex integrates external inputs sensed by focal  
140 adhesions, such as substrate stiffness, to regulate transcription (Carley et al., 2022), but  
141 how the LINC complex relays signals from the nucleus to the cell periphery is less  
142 understood.

143

144         The LINC complex functions in cultured endothelial cells, as knockdown of  
145 nesprin-3 leads to impaired endothelial polarity under flow (Morgan et al., 2011), while  
146 nesprin-2 and lamin A regulate proliferation and apoptosis in endothelial cells exposed  
147 to shear stress (Han et al., 2015). Depletion of nesprin-1 alters tension on the nucleus  
148 (Chancellor et al., 2010; Anno et al., 2012), and knockdown of nesprin-1 or nesprin-2  
149 leads to reduced collective endothelial migration (Chancellor et al., 2010; King et al.,  
150 2014). Recent work showed compromised matrix adhesion and barrier function of  
151 cultured endothelial cells using a dominant negative KASH (Denis et al., 2021).  
152 However, less is understood about the roles of the SUN proteins in endothelial cell  
153 function.

154

155         The LINC complex is required for viability *in vivo*. Loss of both mammalian *Sun*  
156 genes is embryonic lethal due to impaired neuronal nuclear migration required for

157 proper neuronal differentiation (Lei et al., 2009; Zhang et al., 2009). Global *Sun2* loss  
158 affects epidermal nuclear positioning and cell adhesion, leading to alopecia (Stewart et  
159 al., 2015), while global loss of both *Sun* genes impairs epidermal differentiation due to  
160 altered integrin signaling (Carley et al., 2021). A role for the LINC complex in  
161 mechanotransduction *in vivo* is suggested by findings that perturbations in mechanically  
162 active skeletal and cardiac muscle affect function (Zhang et al., 2005, 2010; Lei et al.,  
163 2009; Banerjee et al., 2014; Stroud et al., 2017; Zhou et al., 2017; van Ingen & Kirby,  
164 2021). However, while global deletion of multiple LINC components to disrupt the entire  
165 complex highlight its importance (Lei et al., 2009; Zhang et al., 2009; Carley et al.,  
166 2021), these studies do not reveal functions of individual LINC components in specific  
167 tissues. Whether the SUN proteins cell autonomously regulate the vascular  
168 endothelium, which is also mechanically active due to outward pressure and shear  
169 stress from blood flow, has not been explored.

170

171 Mutations in *LMNA* (lamin A/C) cause a premature aging syndrome linked to  
172 cardiovascular defects (Capell & Collins, 2006). The LINC complex protein SUN1 is  
173 mis-expressed in this disease (Chen et al., 2012), and cellular defects due to the *LMNA*  
174 mutation are rescued by reduced levels of SUN1 protein, highlighting a potential  
175 function for SUN1 in the disease pathology (Chen et al., 2012; Chang et al., 2019).  
176 Here, we present an in-depth analysis of how the LINC complex component SUN1  
177 affects blood vessel development and function *in vivo*. We found that *Sun1* cell-  
178 autonomously regulates blood vessel sprouting and barrier function *in vivo*, and these  
179 effects are consistent with SUN1 regulating endothelial cell functions via adherens  
180 junction activity. In primary endothelial cells, nuclear SUN1 coordinates peripheral  
181 microtubule dynamics that in turn regulate peripheral RhoGEF activation, junction

182 stability and barrier function. Thus, nuclear SUN1 that resides far from endothelial cell  
183 junctions regulates endothelial cell-cell communication and blood vessel sprouting via a  
184 novel microtubule-based integration pathway from the nucleus to the cell periphery.

185

186



187 **RESULTS**

188 ***The nuclear LINC protein SUN1 regulates vascular development***

189 The LINC complex is important for cell migration (Chancellor et al., 2010; King et  
190 al., 2014; Denis et al., 2021), and blood vessel formation involves extensive endothelial  
191 cell migration; thus, we hypothesized that the LINC complex regulates angiogenic  
192 sprouting. Because mutations in endothelial cell *LMNA* causative for human  
193 cardiovascular disease are associated with expression changes in the LINC protein  
194 SUN1 (Chen et al., 2012), and because *Sun1* has not been functionally analyzed in the  
195 vascular endothelium *in vivo*, we first asked whether SUN1 is required for vascular  
196 development. Utilizing a mouse line carrying a conditional *Sun1* allele that we generated  
197 from *Sun1<sup>tm1a</sup>* “knockout first” mice (**Figure 1-figure supplement 1A-B**), *Sun1<sup>fl/fl</sup>* mice  
198 were bred to *Sun1<sup>fl/+</sup>;Cdh5CreERT2/+* mice to generate *Sun1<sup>iECKO</sup>* (inducible endothelial  
199 cell knockout) mice with both endothelial cell-selective and temporal control over *Sun1*  
200 excision. Examination of lung DNA, which is rich in endothelial cells, revealed  
201 appropriate excision *in vivo* (**Figure 1-figure supplement 1C**).

202

203 The retinal vasculature of *Sun1<sup>iECKO</sup>* pups injected with tamoxifen at P (postnatal  
204 day) 1-3 and harvested at P7 had significantly reduced radial expansion relative to  
205 littermate controls (**Figure 1A-C, Figure 1-figure supplement 1D**), consistent with a  
206 role for *Sun1* in vascular development. *Sun1<sup>iECKO</sup>* retinas also had increased density at  
207 the vascular front (**Figure 1-figure supplement 1E**), consistent with defects in  
208 sprouting that prevent expansion and thus increase density (Hellström et al., 2007;  
209 Ricard et al., 2012; Angulo-Urarte et al., 2018). Since vessel densities in the plexus  
210 ahead of arteries and veins exhibit heterogeneity, we measured by area and found  
211 increased density in the plexus ahead of both arteries and veins in *Sun1<sup>iECKO</sup>* retinas

212 **(Figure 1B, D)**. Because adherens junction dynamics regulate vascular sprouting  
213 (Sauteur et al., 2014), this mutant phenotype suggested that endothelial cell-cell  
214 junctions were affected by loss of *Sun1*. VE-cadherin localization, a readout of junction  
215 integrity (Huveneers et al., 2012; Bentley et al., 2014; Wylie et al., 2018; Vion et al.,  
216 2020), was significantly less linear and more punctate in *Sun1<sup>IECKO</sup>* vessels, indicating  
217 increased adherens junction turnover and junction instability **(Figure 1E-F)**. Dextran  
218 injection was used to functionally evaluate the effects of *Sun1* loss on vascular barrier  
219 function *in vivo*, and *Sun1<sup>IECKO</sup>* mice had increased signal in the surrounding tissue  
220 compared to controls **(Figure 1-figure supplement 1F)**, suggesting increased vessel  
221 permeability. Together, these data indicate a specific role for SUN1 in angiogenic  
222 sprouting and endothelial cell-cell junctions *in vivo*.

223

### 224 ***Nuclear SUN1 is required for sprouting angiogenesis***

225 *Sun1* loss disrupts vascular development in the postnatal mouse retina **(Figure**  
226 **1)**, but this tissue is not amenable to long-term live image analysis. To query dynamic  
227 aspects of angiogenic sprouting, which occurs via regulated changes in endothelial  
228 adherens junction stability (Sauteur et al., 2014; Angulo-Urarte et al., 2018; Wylie et al.,  
229 2018), we utilized a 3D sprouting model (Nakatsu & Hughes, 2008) coupled with  
230 temporal image acquisition. Reduced levels of endothelial cell SUN1 via siRNA  
231 knockdown (KD) **(Figure 2-figure supplement 1A-B)** led to significantly decreased  
232 sprout length and branching **(Figure 2A-C)**, reminiscent of the decreased radial  
233 expansion of *Sun1<sup>IECKO</sup>* retinal vessels described above. SUN1 depletion did not  
234 significantly influence the proportion of EdU-labeled or Ki67 stained cells **(Figure 2-**  
235 **figure supplement 1C-F)**, indicating that the abnormal sprouting and branching is not  
236 downstream of reduced proliferation. Live-cell imaging revealed that control sprouts

237 typically elongated over time, with little retraction once they extended from the bead  
238 **(Figure 2D-E, Movie 1)**. In contrast, SUN1 KD sprouts retracted more often, and many  
239 mutant sprouts collapsed partially or completely **(Figure 2D-E, Movie 2)**. SUN1 KD  
240 sprouts also showed a more diffuse VE-cadherin junction pattern **(Figure 2F-G)**, similar  
241 to those of *Sun1<sup>iECKO</sup>* mice and indicative of over-activated junctions. Thus, SUN1 is  
242 required for proper vascular sprout dynamics and morphology, and reduced sprout  
243 length and branching are likely downstream of excess sprout retractions and perturbed  
244 junctions in SUN1-depleted vessels.

245

246         The LINC complex is important for mechanotransduction in muscle fibers with  
247 high mechanical loads (van Ingen & Kirby, 2021), and sprouting angiogenesis is  
248 regulated by mechanical forces arising from blood pressure and blood flow (Huang et  
249 al., 2003). To determine whether SUN1 also regulates sprouting dynamics under  
250 laminar flow *in vivo*, we analyzed embryonic zebrafish using a *Tg(fli:LifeAct-GFP)*  
251 reporter that labels the endothelial actin cytoskeleton. Zebrafish have two *Sun1* genes,  
252 *sun1a* and *sun1b*; the SUN domain of *sun1b* is more homologous to human *SUN1*, and  
253 *Sun1b* is more highly expressed in cardiovascular tissue, so this gene was chosen for  
254 manipulation. *Sun1b* depletion in zebrafish embryos via morpholino (MO) injection led to  
255 significantly increased numbers of shorter endothelial cell filopodia at 33-34 hpf (hours  
256 post fertilization) in the inter-segmental vessels (ISVs) that sprout towards and connect  
257 to the dorsal longitudinal anastomotic vessel (DLAV) **(Figure 3A-C)**. Like the  
258 morphants, fish carrying a point mutation in the *sun1b* gene leading to a premature stop  
259 codon (*sun1b<sup>sa33109</sup>*, see Methods for details) had shorter filopodia, although filopodia  
260 numbers were unchanged in the mutant background **(Figure 3D-F)**. Because increased  
261 filopodia are typically seen in actively migrating and sprouting endothelial cells

262 (DeLisser, 2011), these changes are consistent with Sun1b regulating endothelial cell  
263 activation in developing zebrafish vessels exposed to physiological flow forces.

264

265 Next, *sun1b* morphant fish were imaged from 26-36 hpf to determine the effects  
266 of Sun1b depletion on vascular sprouting *in vivo*. In controls, the ISVs sprouted towards  
267 the dorsal plane and connected to the DLAV between 32-36 hpf (**Figure 3G-H, Movie**  
268 **3**). In contrast, numerous ISVs either failed to reach the DLAV or made aberrant  
269 connections in *sun1b* morphant fish (**Figure 3G-H, Movie 4**). Staining for the tight  
270 junction protein ZO-1 revealed less linear and more abnormally shaped junctions in  
271 *sun1b* morphant fish (**Figure 3I-J**). These results complement the 3D sprouting analysis  
272 and show that the nuclear LINC complex protein SUN1 is important in regulating  
273 endothelial cell sprouting dynamics and junction morphology under flow forces *in vivo*.

274

### 275 ***SUN1 stabilizes endothelial cell-cell junctions and regulates barrier function***

276 SUN1 loss or depletion in mouse, zebrafish, and 3D sprouting models resulted in  
277 abnormal endothelial cell-cell junctions and sprouting behaviors. Thus, we examined  
278 more rigorously the hypothesis that SUN1 regulates endothelial cell junction stability  
279 and morphology. Primary human umbilical vein endothelial cells (HUVEC) in confluent  
280 monolayers had more serrated cell-cell junctions without altered levels of VE-cadherin  
281 protein expression after SUN1 depletion, indicative of activated and destabilized  
282 junctions (**Figure 4A, Figure 4-figure supplement 1A-B**). Activated and destabilized  
283 endothelial cell adherens junctions are associated with impaired vascular barrier  
284 function, so we measured electrical resistance across endothelial monolayers using  
285 Real Time Cell Analysis (RTCA) that provides an impedance value positively correlated  
286 with barrier function. SUN1 KD endothelial cells had reduced electrical resistance

287 compared to controls (**Figure 4B-C**), indicative of impaired barrier function and  
288 consistent with the increased dextran permeability *in vivo*. Endothelial cells *in vivo* are  
289 exposed to blood flow that remodels endothelial junctions (Seebach et al., 2000; Yang  
290 et al., 2020). SUN1 depleted HUVEC exposed to laminar shear stress for 72h elongated  
291 and aligned properly, but adherens junctions were more serrated and allowed for  
292 significantly more matrix exposure as assessed by a biotin labeling assay (Dubrovskiy  
293 et al., 2013) under both static and flow conditions (**Figure 4D-F, Figure 4-figure**  
294 **supplement 1C-D**). These findings support the hypothesis that nuclear SUN1 regulates  
295 vascular barrier function via effects on endothelial cell junction stability and morphology.

296

297         Dysfunctional cell-cell junctions can result from abnormal junction formation or  
298 the inability of formed junctions to stabilize. To determine how SUN1 functionally  
299 regulates endothelial junctions, adherens junctions were disassembled via  $Ca^{2+}$   
300 chelation, then reformed upon chelator removal. Junctions were measured using line  
301 scans of VE-cadherin intensity along the cell-cell junctions (**Figure 4-figure**  
302 **supplement 1E**), such that junctions with a linear VE-cadherin signal (stable) had a  
303 higher value than those with more serrated patterns (destabilized). No significant  
304 difference between SUN1 KD and control junctions was seen at early times post-  
305 washout, indicating that SUN1 depletion does not affect adherens junction formation  
306 (**Figure 4G-H**). However, later times post-washout revealed a significant increase in  
307 serrated junctions and gaps between endothelial cells in SUN1 KD monolayers relative  
308 to controls (**Figure 4G-H**). Consistent with these findings, SUN1 KD endothelial cells  
309 also had increased VE-cadherin internalization at steady state, consistent with actively  
310 remodeling junctions (**Figure 4-figure supplement 1F-G**). Thus, SUN1 is not required

311 to form endothelial cell-cell junctions but is necessary for proper junction maturation and  
312 stabilization.

313

314 ***SUN1 regulates microtubule localization and dynamics in endothelial cells absent***  
315 ***effects on gene transcription***

316 We next considered how SUN1 that resides in the nuclear membrane regulates  
317 cell behaviors at the cell periphery. SUN1 may affect cell junctions directly via the  
318 cytoskeleton, or SUN1 may indirectly affect junctions downstream of gene expression  
319 regulation. Because SUN1 is reported to regulate gene transcription and RNA export in  
320 other cell types (Li et al., 2017; May & Carroll, 2018), we asked whether endothelial cell  
321 transcriptional profiles were altered by SUN1 depletion. To our surprise, RNASeq  
322 analysis of HUVEC under both static and flow conditions revealed essentially no  
323 significant changes in RNA profiles except for *SUN1* itself (**Table 1, Figure 5-figure**  
324 **supplement 1**), while in the same experiment we documented extensive expression  
325 changes in both up- and down-regulated genes between control HUVEC in static vs.  
326 laminar flow conditions, as we and others have shown (Conway et al., 2010; Liu et al.,  
327 2021; Maurya et al., 2021; Ruter et al., 2021). These findings are similar to a re-analysis  
328 of HeLa cell data (data not shown, (Li et al., 2017)) that revealed few significant  
329 changes in gene expression following SUN1 depletion. Thus, although the LINC  
330 complex is important for nuclear communication that can affect gene expression, SUN1  
331 is not required for this communication in endothelial cells.

332

333 We hypothesized that SUN1 directly regulates endothelial cell junction stability  
334 via the cytoskeleton. SUN1 has a functional relationship with the microtubule  
335 cytoskeleton (Zhu et al., 2017), and microtubule dynamics regulate endothelial cell-cell

336 junctions (Sehrawat et al., 2008, 2011; Komarova et al., 2012). Thus, we asked whether  
337 the observed adherens junction defects following SUN1 depletion resulted from  
338 changes in the microtubule cytoskeleton. Microtubule depolymerization via nocodazole  
339 treatment phenocopied SUN1 KD and destabilized adherens junctions in control  
340 monolayers but did not exacerbate the junction defects seen with SUN1 KD (**Figure 5A-**  
341 **B**). These findings suggest that endothelial cell junction defects are downstream of  
342 microtubule perturbations induced by SUN1 depletion.

343

344 We next investigated how SUN1 affects microtubule localization in endothelial  
345 cell monolayers and found that significantly fewer microtubules reached the cell  
346 periphery or surrounded the nucleus in SUN1 depleted cells (**Figure 5C, E, Figure 5-**  
347 **figure supplement 2A-B**). The changes in peripheral microtubule localization were  
348 accompanied by significantly fewer microtubule-junction contacts, while  $\alpha$ -tubulin levels  
349 around the MTOC were not affected (**Figure 5C, D, F**). Microtubule dynamics were  
350 assessed via tip tracking using mCherry-labeled tip protein EB3, which decorated the  
351 microtubule lattice and concentrated at growing microtubule tips (**Figure 5G**). This  
352 labeling pattern can occur with EB overexpression but does not affect growth rate  
353 (Komarova et al., 2005), so the decorated lattice was used to assess microtubule  
354 catastrophe and shrinkage. Microtubules in SUN1 depleted cells had increased  
355 shrinkage rates (a more negative value) coupled with increased catastrophe rate and  
356 time spent shrinking (**Figure 5G-K, Movies 5, 6**), consistent with elevated microtubule  
357 depolymerization and impaired microtubule dynamics downstream of SUN1 loss, while  
358 the microtubule growth rate was unchanged. Taken together, these results indicate that  
359 loss of SUN1 impairs microtubule localization and dynamics, and these changes  
360 associate with destabilized endothelial cell junctions.



361 ***SUN1 regulates endothelial cell contractility***

362           Microtubule dynamics communicate with the actin cytoskeleton to regulate cell-  
363 cell junctions (Verin et al., 2001; Birukova et al., 2004, 2006), and cellular changes in  
364 actomyosin contractility contribute to junction activation (Rauzi et al., 2010; Huveneers  
365 et al., 2012). We hypothesized that actomyosin mis-regulation induced by SUN1  
366 depletion contributes to endothelial cell junction destabilization and found that SUN1  
367 depletion led to ectopic stress fibers, distinct radial actin bundles at the periphery, and  
368 increased phosphorylated myosin light chain (ppMLC), consistent with increased  
369 actomyosin contractility (**Figure 6-figure supplement 1A-B**). Pharmacological  
370 blockade of myosin-II ATPase rescued the destabilized cell junctions, ectopic stress  
371 fibers and radial actin structures seen with SUN1 depletion (**Figure 6A-B, Figure 6-**  
372 **figure supplement 1C**), suggesting that SUN1 depletion increases contractility. In  
373 contrast, thrombin treatment that induces contractility produced over-activated junctions  
374 in controls that phenocopied SUN1 depletion but did not further activate junctions of  
375 SUN1 KD cells, indicating that SUN1 loss induces a maximal contractile state (**Figure**  
376 **6C-D**). Taken together, these data indicate that SUN1 loss results in hypercontractility  
377 and destabilized endothelial cell-cell junctions.

378

379 ***SUN1 affects endothelial junctions through microtubule-associated Rho GEF-H1***

380           To better understand the link between microtubule dynamics, actomyosin  
381 contractility, and junction regulation in endothelial cells, we examined Rho signaling  
382 downstream of SUN1 in endothelial cells. SUN1 silencing increases RhoA activity in  
383 HeLa cells (Thakar et al., 2017), and pharmacological inhibition of Rho kinase (ROCK)  
384 signaling in SUN1 depleted endothelial cells rescued the destabilized endothelial cell-  
385 cell junctions (**Figure 6-figure supplement 2A-B**) and prevented the radial actin



386 structures (**Figure 6-figure supplement 1D**). RhoA signaling and barrier function in  
387 endothelial cells is regulated by the microtubule-associated RhoGEF, GEF-H1, which is  
388 inactive while bound to microtubules and activated following microtubule  
389 depolymerization and release (Krendel et al., 2002; Birukova et al., 2006; Birkenfeld et  
390 al., 2008). We hypothesized that the impaired microtubule dynamics and Rho-  
391 dependent hypercontractility observed following SUN1 depletion were linked via GEF-  
392 H1. Consistent with this idea, GEF-H1 strongly localized to peripheral microtubules in  
393 control cells but was significantly less localized and more diffuse in SUN1 depleted  
394 endothelial cells (**Figure 6E-F**). Furthermore, depletion of GEF-H1 in endothelial cells  
395 that were also depleted for SUN1 rescued the destabilized cell-cell junctions observed  
396 with SUN1 KD alone (**Figure 6G-H, Figure 6-figure supplement 2C**), showing that  
397 GEF-H1 is required to transmit the effects of SUN1 depletion to endothelial cell  
398 junctions. Thus, nuclear SUN1 normally promotes microtubule-GEFH1 interactions to  
399 regulate actomyosin contractility and endothelial cell-cell junction stability, providing a  
400 novel linkage from the LINC complex to endothelial cell junctions via the microtubule  
401 cytoskeleton.

402

### 403 ***SUN1 exerts its effects on endothelial junctions through nesprin-1***

404 Since SUN1 binds nesprins to interact with the cytoskeleton, we considered  
405 whether SUN1-nesprin interactions were involved in SUN1 regulation of microtubule  
406 dynamics and endothelial cell junction stability. The KASH protein nesprin-1 modulates  
407 tight junction protein localization under laminar shear stress (Yang et al., 2020) and  
408 regulates microtubule dynamics at the nucleus in muscle syncytia (Gimpel et al., 2017).  
409 Co-depletion of SUN1 with nesprin-1 in endothelial cells rescued the effects of SUN1  
410 depletion on junction morphology and functional destabilization measured by matrix

411 biotin labeling (**Figure 7A-B, Figure 7-figure supplement 1A**). This rescue extended to  
412 the cytoskeleton, as co-depletion rescued both decreased peripheral microtubule  
413 density and microtubule-GEF-H1 contacts seen with SUN1 depletion (**Figure 7-figure**  
414 **supplement 1B-E**). Thus, the LINC complex protein nesprin-1 is required to transmit  
415 the effects of SUN1 depletion to endothelial cell junctions.

416

## 417 **DISCUSSION**

418         The nucleus compartmentalizes and organizes genetic material, but how the  
419 nucleus directly communicates with other organelles and the cytoskeleton to regulate  
420 cell behaviors is poorly understood. Here, we show for the first time that the nuclear  
421 LINC complex protein SUN1 regulates angiogenic sprouting and vascular barrier  
422 function via long-distance regulation of endothelial cell-cell junctions *in vivo*, and that  
423 these effects go through the microtubule cytoskeleton to regulate microtubule dynamics  
424 and actomyosin contractility. Our data is consistent with a model in which endothelial  
425 SUN1 stabilizes peripheral microtubules that coordinate activity of the microtubule-  
426 associated Rho exchange factor GEF-H1. GEF-H1 becomes activated to stimulate Rho  
427 signaling upon release from microtubules, and we posit that peripheral microtubules  
428 normally regulate local GEF-H1 activity to maintain appropriate microtubule-junction  
429 interactions and actomyosin contractility in endothelial cells, leading to cell-cell junctions  
430 that remodel to support angiogenic sprouting and maintain vessel barrier integrity  
431 (**Figure 7C**). Loss of SUN1 reduces peripheral microtubules, resulting in GEF-H1 over-  
432 activation, elevated RhoA signaling, and increased contractility, leading to destabilized  
433 endothelial cell adherens junctions that impair blood vessel formation and function in  
434 fish and mice. The LINC complex is further implicated in endothelial junction regulation  
435 by our finding that the KASH protein nesprin-1 is required for the effects of SUN1 loss

436 on microtubules, GEF-H1, and proper junction function. Thus, we describe a specific  
437 role for SUN1 as a critical mediator of communication between the endothelial cell  
438 nucleus and the cell periphery via microtubule regulation of GEF-H1.

439

440 We show that the LINC complex protein SUN1 is required for endothelial  
441 adherens junction stabilization and proper blood vessel formation and function *in vivo*.  
442 Although *Sun2* partially compensates for loss of *Sun1* developmentally (Lei et al., 2009;  
443 Zhang et al., 2009) and thus may prevent more profound vascular effects, the significant  
444 vascular defects in vessels lacking *Sun1* indicate non-redundant functions for SUN1 in  
445 vascular development. The adherens junctions of expanding retinal vessels are  
446 destabilized in mice lacking endothelial *Sun1*, and this cellular phenotype is  
447 accompanied by increased vessel permeability, reduced radial expansion, and  
448 increased network density, indicating that destabilized junctions contribute to the vessel  
449 network perturbations. Mutations in other genes that affect endothelial cell junction  
450 integrity, such as *Smad6*, *Pi3kca*, and *Yap/Taz*, also perturb retinal angiogenesis  
451 (Angulo-Urarte et al., 2018; Neto et al., 2018; Wylie et al., 2018). Live-image analysis of  
452 active vessel sprouting showed that SUN1 regulates filopodia dynamics and  
453 anastomosis in zebrafish and sprout dynamics in mammalian endothelial cell sprouts,  
454 and these vessels also had abnormal junctions in the absence of SUN1. Altered sprout  
455 dynamics are found in other scenarios where VE-cadherin is absent or abnormal such  
456 as Wnt inhibition, loss of VE-cadherin, PI3-kinase inhibition, and excess centrosomes  
457 (Sauteur et al., 2014, 2017; Kushner et al., 2016; Angulo-Urarte et al., 2018; Hübner et  
458 al., 2018; Buglak et al., 2020). The LINC complex regulates endothelial cell aggregation  
459 into tube-like structures in Matrigel (King et al., 2014; Denis et al., 2021), consistent with  
460 our findings that highlight a central role for SUN1 in blood vessel formation *in vivo*.

461 Unlike genes encoding components of junctions and signaling effectors, SUN1 functions  
462 at significant cellular distances from cell junctions.

463

464         How does SUN1 regulate endothelial cell-cell junctions from a distance? The  
465 importance of the LINC complex in transducing signals from the cell periphery and  
466 outside the cell to the nucleus to affect nuclear envelope properties and gene  
467 transcription is well-studied (Carley et al., 2022); however, how information goes from  
468 the nucleus to the cell periphery is less well-understood. Although the LINC complex is  
469 clearly important in nucleus-to-cytoplasm communication, most studies have globally  
470 manipulated the LINC complex (Zhang et al., 2009; Graham et al., 2018; Carley et al.,  
471 2021; Denis et al., 2021), and how individual components contribute is not well-  
472 understood. Recently Ueda et al (2022) found that SUN1 regulated focal adhesion  
473 maturation in non-endothelial cells *in vitro* via effects on the actin cytoskeleton (Ueda et  
474 al., 2022), and we found that SUN1 regulates endothelial cell-cell junctions through  
475 microtubules, suggesting that SUN1 is important for signaling from the nucleus to the  
476 cell periphery by regulating cytoskeletal organization at several levels. SUN1 is thought  
477 to be important in microtubule-associated LINC complex functions (Zhu et al., 2017),  
478 and disruption of microtubules or their dynamics destabilizes adherens junctions in both  
479 endothelial and non-endothelial cells (Komarova et al., 2012; Vasileva & Citi, 2018).  
480 Microtubule plus end dynamics regulate E-cadherin accumulation at epithelial cell  
481 adherens junctions (Stehbens et al., 2006), and dynein is thought to anchor microtubule  
482 plus ends to junctions via the plus end binding protein EB1 (Ligon et al., 2001; Shaw et  
483 al., 2007; Bellett et al., 2009). Microtubule minus ends also regulate protein  
484 accumulation at junctions and are anchored to the junction through a complex involving  
485 p120 catenin, PLEKHA7, and CAMSAP3 (Meng et al., 2008). Our data show that SUN1

486 depletion impairs both microtubule dynamics and microtubule localization. Specifically,  
487 elevated rates of microtubule catastrophe and shrinkage absent changes in growth rate  
488 likely account for reduced peripheral microtubule density and microtubule-junction  
489 contacts. Endothelial junction destabilization was phenocopied by microtubule  
490 depolymerization, consistent with our model that the influence of SUN1 on microtubule  
491 dynamics and localization is important for the stabilization of endothelial cell junctions.

492

493         Here we show that SUN1 regulates endothelial cell junctions via the microtubule-  
494 regulated Rho activator GEF-H1. GEF-H1 specifically modulates RhoA signaling at  
495 endothelial cell adherens junctions to influence VE-cadherin internalization (Juettner et  
496 al., 2019). Microtubule depolymerization releases GEF-H1 to activate RhoA signaling  
497 and elevate actomyosin contractility (Krendel et al., 2002; Birkenfeld et al., 2008) in non-  
498 endothelial cells, while direct manipulation of GEF-H1 via depletion or blockade  
499 attenuates agonist-induced endothelial barrier dysfunction (Birukova et al., 2006). Our  
500 work revealed that peripheral GEF-H1 localization was more diffuse following  
501 endothelial SUN1 silencing, suggesting its activation with SUN1 loss, and Rho-kinase  
502 inhibition rescued the SUN1 depletion-induced destabilization of endothelial cell  
503 junctions. These findings support that altered microtubule dynamics downstream of  
504 SUN1 depletion promote the release and over-activation of peripheral GEF-H1, and this  
505 activation destabilizes cell junctions.

506

507         Thus, SUN1 regulation of microtubule dynamics is linked to its regulation of  
508 endothelial cell junction stability, although exactly how SUN1 influences microtubule  
509 dynamics and function is unclear. SUN1 resides in the nuclear envelope and alters  
510 gene transcription in other cell types (Li et al., 2017; May & Carroll, 2018). Our

511 transcriptional analysis of endothelial cells under flow did not reveal significant  
512 transcriptome changes with SUN1 depletion, indicating that SUN1 regulation of  
513 endothelial junctions occurs via its role in LINC complex interactions with the  
514 cytoskeleton. Nesprin-1, a KASH protein that functions in LINC complex-cytoskeletal  
515 interactions, is shown here to mediate the effects of SUN1 loss on endothelial junctions,  
516 suggesting that SUN1 normally sequesters nesprin-1 to prevent formation of ectopic  
517 complexes. Since fewer microtubules surrounded the nucleus in SUN1-depleted  
518 endothelial cells, SUN1 may normally prevent abnormal or unstable nesprin-1 LINC  
519 complexes that promote microtubule depolymerization, and SUN1 loss allows these  
520 complexes to form. SUN1 may compete for nesprin-1 binding with other nuclear  
521 envelope proteins that interact with nesprin-1, such as SUN2 or nesprin-3 (Stewart-  
522 Hutchinson et al., 2008; Taranum et al., 2012; Yang et al., 2020). This idea is consistent  
523 with the finding that SUN1 antagonizes SUN2-based LINC complexes that promote  
524 RhoA activity in HeLa cells, although microtubule localization changes were not  
525 reported (Thakar et al., 2017).

526

527         Our finding that SUN1 regulates endothelial cell barrier function and blood vessel  
528 sprouting has implications for diseases associated with aging, as vascular defects  
529 underlie most cardiovascular disease. Children with Hutchinson-Gilford Progeria  
530 Syndrome (HGPS) have a mutation in the *LMNA* gene encoding lamin A/C, resulting in  
531 accumulation of an abnormal lamin protein called progerin; these patients age rapidly  
532 and die in their early to mid-teens from severe atherosclerosis (De Sandre-Giovannoli,  
533 2003; Eriksson et al., 2003; Olive et al., 2010). Progerin has increased SUN1 affinity  
534 that leads to SUN1 accumulation in HGPS patient cells (Haque et al., 2010; Chen et al.,  
535 2012, 2014; Chang et al., 2019). Endothelial cells also accumulate SUN1 in HGPS

536 mouse models (Osmanagic-Myers et al., 2019), and loss of *Sun1* partially rescues  
537 progeria phenotypes in mouse models and patient cells (Chen et al., 2012; Chang et al.,  
538 2019). Thus, nuclear membrane perturbations affecting SUN1 cause disease, and here  
539 we find that nuclear SUN1 regulates microtubules to affect both the microtubule and  
540 actin cytoskeletons. These effects are transmitted to endothelial cell-cell junctions far  
541 from the site of SUN1 localization to influence endothelial cell behaviors, blood vessel  
542 sprouting and barrier function.

543 **MATERIALS & METHODS**

544 ***Microscopy***

545 Unless otherwise stated, all imaging was performed as follows: confocal images  
546 were acquired with an Olympus confocal laser scanning microscope and camera  
547 (Fluoview FV3000, IX83) using 405nm, 488nm, 561nm, and 640nm lasers and a  
548 UPlanSApo 40x silicone-immersion objective (NA 1.25), UPlanSApo 60x oil-immersion  
549 objective (NA 1.40), or UPlanSApo 100x oil-immersion objective (NA 1.40). Imaging  
550 was performed at RT for fixed samples. Images were acquired with the Olympus  
551 Fluoview FV31S-SW software and all image analysis, including Z-stack compression,  
552 was performed in Fiji (Linkert et al., 2010; Schindelin et al., 2012). Any adjustments to  
553 brightness and contrast were performed evenly for images in an experiment.

554

555 ***Mice***

556 All experiments involving animals were performed with approval from the  
557 University of North Carolina, Chapel Hill Institutional Animal Care and Use Committee  
558 (IACUC). C57Bl6N-*Sun1<sup>tm1a</sup>(EUCOMM)<sup>Wtsi</sup>/CipheOrl* mice were obtained from the European  
559 Mouse Mutant Archive (EMMA) mouse repository. FlpO-B6N-Albino (*Rosa26-FlpO/+*)  
560 mice were obtained from the UNC Animal Models Core. *Tg(Cdh5-cre/ERT2)1Rha* mice  
561 were generated by Dr. Ralf Adams (Sörensen et al., 2009) and obtained from Cancer  
562 Research UK. The *Sun1<sup>tm1a</sup>* allele was identified via genomic PCR to amplify the LacZ  
563 insertion (Forward: 5'- ACTATCCCGACCGCCTTACT-3'; Reverse: 5'-  
564 TAGCGGCTGATGTTGAACTG-3'). The *Sun1<sup>fl</sup>* allele was generated by breeding  
565 *Sun1<sup>tm1a</sup>* mice with FlpO-B6N-Albino (*Rosa26-FlpO/+*) mice to excise the *lacZ* insertion.  
566 The *Sun1<sup>fl</sup>* allele was identified via genomic PCR using the following primers (Forward:  
567 5'- GCTCTCTGAAACATGGCTGA-3'; Reverse: 5'- ATCCGGGGTGTGGATTAT-3').



568 *Sun1<sup>fl</sup>* mice were bred to *Tg(Cdh5-cre/ERT2)1Rha* mice to generate  
569 *Sun1<sup>fl/fl</sup>;Cdh5CreERT2* pups for endothelial-selective and temporally controlled deletion  
570 of exon 4 of the *Sun1* gene. The excised *Sun1* allele was identified via genomic PCR on  
571 lung tissue using the following primers (Forward: 5'- CTTTTGGGCTGCTCTGTTGT-3';  
572 Reverse: 5'- ATCCGGGGTGTGGATTAT-3'). PCR genotyping for FlpO and  
573 *Cdh5CreERT2* mice was performed with the following primers (FlpO: Forward: 5'-  
574 TGAGCTTCGACATCGTGAAC -3'; Reverse: 5'-TCAGCATCTTCTTGCTGTGG-3')  
575 (*Cdh5CreERT2*: Forward: 5'- TCCTGATGGTGCCTATCCTC-3'; Reverse: 5'-  
576 CCTGTTTTGCACGTTACCG-3'). Induction of Cre was performed via IP injection of  
577 pups at P1, P2, and P3 with 50µl of 1mg/ml tamoxifen (T5648, Sigma) dissolved in  
578 sunflower seed oil (S5007, Sigma). Littermates lacking either *Cdh5CreERT2* or the  
579 *Sun1<sup>fl</sup>* allele were used as controls.

580

### 581 ***Mouse retinas***

582 Tamoxifen-injected mice were sacrificed at P7, eyes were collected, fixed in 4%  
583 PFA for 1h at RT, then dissected and stored at 4°C in PBS for up to 2 weeks (Chong et  
584 al., 2017). Retinas were permeabilized in 0.5% Triton X-100 (T8787, Sigma) for 1h at  
585 RT, blocked for 1h at RT in blocking solution (0.3% Triton X-100, 0.2% BSA (A4503,  
586 Sigma), and 5% goat serum (005-000-121, Jackson Immuno)), then incubated with VE-  
587 cadherin antibody (anti-mouseCD144, 1:100, 550548, BD Pharmingen) in blocking  
588 solution overnight at 4°C. Samples were washed 3X, then incubated with Isolectin B4  
589 AlexaFluor 488 (1:100, I21411, ThermoFisher) and goat anti-rat AlexaFluor 647 (1:500,  
590 A21247, Life Technologies) for 1h at RT. Retinas were mounted with Prolong Diamond  
591 Antifade mounting medium (P36961, Life Technology) and sealed with nail polish.  
592 Images were obtained using either a UPlanSApo 10x air objective (NA 0.40) or

593 UPlanSApo 40x silicone-immersion objective (NA 1.25). Percent radial expansion was  
594 calculated by dividing the distance from the retina center to the vascular front by the  
595 distance from the retina center to the edge of the tissue. Four measurements/retina  
596 were averaged. Vascular density was measured by imaging a 350 $\mu$ m x 350 $\mu$ m ROI at  
597 the vascular edge. Fiji was used to threshold images, and the vessel area was  
598 normalized to the area of the ROI (n=4 ROI/retina, chosen at 2 arteries and 2 veins).  
599 Junctions were measured by taking the ratio of the mean intensity of the junction and  
600 the mean intensity of the area immediately adjacent to the junction. Mean intensity was  
601 measured via line scans in Fiji. 16 junctions/retina were measured.

602

### 603 ***Retina blood vessel permeability***

604 Tamoxifen-injected mice were anesthetized at P7 in isoflurane for 5 min. The  
605 abdomen was opened, and the diaphragm was cut. 100 $\mu$ l of 5mg/ml 10kDa Dextran-  
606 Texas Red (D1863, Invitrogen) in PBS was injected into the left ventricle of the heart.  
607 Eyes were immediately collected and fixed in 4% PFA for 1h at RT, then dissected and  
608 stained as described above. Leak was determined by making a mask of the vessel area  
609 using the isolectin channel, then assessing the dextran signal outside the vessel.

610

### 611 ***3D sprouting angiogenesis assay***

612 The 3D sprouting angiogenesis assay was performed as previously described  
613 (Nakatsu & Hughes, 2008; Nesmith et al., 2017). 48h following siRNA knockdown,  
614 HUVEC were coated onto cytodex 3 microcarrier beads (17048501, GE Healthcare Life  
615 Sciences) and embedded in a fibrin matrix by combining 7 $\mu$ l of 50U/ml thrombin (T7201-  
616 500UN, Sigma) with 500 $\mu$ l of 2.2 mg/ml fibrinogen (820224, Fisher) in a 24-well glass-  
617 bottomed plate (662892, Grenier Bio). The matrix was incubated for 20 min at RT

618 followed by 20 min at 37°C to allow the matrix to solidify. EGM-2 was then added to  
619 each well along with 200µl of normal human lung fibroblasts (CC2512, Lonza) at a  
620 concentration of  $2 \times 10^5$  cells/ml. At day 7 of sprouting, fibroblasts were removed via  
621 trypsin treatment (5X-trypsin for 3min at 37°C), and samples were fixed in 4% PFA for  
622 15 min at RT. 0.5% Triton X-100 in DBPS was added to the wells, and incubation was  
623 overnight at 4°C. After rinsing 3X in DPBS, samples were blocked (5% goat serum  
624 (005-000-121, Jackson Immuno), 1% BSA (A4503, Sigma), and 0.3% Triton X-100  
625 (T8787, Sigma)) overnight at 4°C. Samples were rinsed 3X in DPBS then anti-VE-  
626 cadherin antibody (1:1000, 2500S, Cell Signaling) in blocking solution was added for  
627 24h at 4°C. Samples were rinsed 3X 10 min in 0.5% Tween 20 then washed overnight  
628 at 4°C in 0.5% Tween. Samples were rinsed 3X in DPBS, then DAPI (0.3µM,  
629 10236276001, Sigma) and AlexaFluor488 Phalloidin (1:50, A12379, Life Technologies)  
630 in blocking solution were added to the wells, and incubation was overnight at 4°C prior  
631 to rinsing 3X in DPBS. For whole bead analysis, images were acquired in the Z-plane  
632 using a UPlanSApo 20x oil-immersion objective (NA 0.58) and processed in Fiji.  
633 Average sprout length was measured by tracing each sprout from base (bead) to tip,  
634 then averaging lengths per bead. Branching was measured by counting total branch  
635 points and normalizing to total sprout length per bead using the AnalyzeSkeleton plugin  
636 (Arganda-Carreras et al., 2010). For junctions, images were acquired in the Z-plane  
637 using a UPlanSApo 60x oil-immersion objective (NA 1.40). Junctions were measured by  
638 taking the ratio of the mean intensity of the junction and the mean intensity of the area  
639 immediately adjacent to the junction. Mean intensity was measured via line scans in Fiji.  
640

641 Live imaging on HUVEC sprouts was performed between days 4-6.5 of  
642 sprouting. Images were acquired on an Olympus VivaView Incubator Fluorescence

643 Microscope with a UPLSAPO 20x objective (NA 0.75) and 0.5x magnification changer  
644 (final magnification 20x) with a Hamamatsu Orca R2 cooled CCD camera at 30 min  
645 intervals for 60h at 37°C. Images were acquired using the MetaMorph imaging software  
646 and analyzed in Fiji. Sprouts were considered to have “retracted” if they regressed  
647 towards the bead for at least 3 imaging frames (1.5h).

648

649 ***Zebrafish***

650 All experimental Zebrafish (*Danio rerio*) procedures performed in this study were  
651 reviewed and approved by the University of North Carolina Chapel Hill Animal Care and  
652 Use Committee. Animals were housed in an AAALAC-accredited facility in compliance  
653 with the *Guide for the Care and Use of Laboratory Animals* as detailed on protocols.io  
654 ([dx.doi.org/10.17504/protocols.io.bg3jykn](https://dx.doi.org/10.17504/protocols.io.bg3jykn)). *Tg(fli:LifeAct-GFP)* was a gift from Wiebke  
655 Herzog. *sun1b*<sup>sa33109</sup> mutant fish were obtained from the Zebrafish International  
656 Resource Center (ZIRC). For genotyping, the target region of the *sun1b* gene was  
657 amplified via genomic PCR using the following primers (Forward: 5'-  
658 GGCTGCGTCAGACTCCATTA-3'; Reverse: 5'-TTGAGTTAAACCCAGCGCCT-3'). The  
659 amplicon was then sequenced by Sanger sequencing (GENEWIZ) using the forward  
660 primer. Morphant fish were obtained by injecting 2.5-5ng of non-targeting (NT) (5'-  
661 CCTCTTACCTCAGTTACAATTTATA-3', GeneTools, LLC) or *sun1b* (5'-  
662 CGCAGTTTGACCATCAGTTTCTACA-3', GeneTools, LLC) morpholinos into  
663 *Tg(fli:LifeAct-GFP)* embryos at the 1-cell stage. Fish were grown in E3 medium at  
664 28.5°C to 33-34 hpf.

665

666 ***Zebrafish imaging***

667 Dechorionated embryos were incubated in ice cold 4% PFA at 4°C overnight or  
668 RT for 2h. Embryos were permeabilized in 0.5% Triton X-100 in PBST (DPBS + 0.1%  
669 Tween 20) for 1 h at RT then blocked (PBST + 0.5% Triton X-100 + 1% BSA + 5% goat  
670 serum + 0.01% sodium azide) for 2h at RT. Anti-ZO1 primary antibody (1:500, 33-9100,  
671 Thermo Fisher) was added overnight at 4°C. Embryos were rinsed in PBST overnight at  
672 4°C. Goat anti-mouse AlexaFluor647 secondary antibody (1:1000, A-21236, Life  
673 Technologies) was added overnight at 4°C. Embryos were washed 3X in PBST for 30  
674 min then overnight in PBST at 4°C. Embryos were rinsed in PBS and a fine probe was  
675 used to de-yolk and a small blade to separate the trunk from the cephalic region.  
676 Samples were mounted using Prolong Diamond Antifade mounting medium (P36961,  
677 Life Technology) and the coverslip was sealed with petroleum jelly. Imaging was at RT  
678 using a UPlanSApo 20x oil-immersion objective (NA 0.58) or a UPlanSApo 60x oil-  
679 immersion objective (NA 1.40) with an additional 3x magnification, for a total  
680 magnification of 180x. Filopodia length was measured by drawing a line from the  
681 filopodia base to the tip. Filopodia number was measured by counting the number of  
682 filopodia and normalizing to the total vessel length. Filopodia in at least 3 areas per fish  
683 were measured. Junctions were analyzed by drawing a line along the junction then  
684 normalizing to the shortest distance between the two ends of the junction. At least 3  
685 junctions were measured per fish.

686

687 For live imaging of zebrafish, fish were dechorionated and then anesthetized with  
688 1x Tricaine in E3 for 5 min. Fish were embedded in 0.5% agarose in 1x Tricaine-E3  
689 medium on a glass-bottomed plate in a stage-top incubator (TOKAI HIT, WSKM) at  
690 28.5°C. Images were acquired using a UPlanSApo 40x air objective (NA 0.95) every

691 15min for 10-15h. ISVs that did not reach the DLAV or connected at non-consistent  
692 intervals were considered to have a missing or aberrant DLAV connection if at least 1  
693 ISV posterior to the scored ISV made a normal connection.

694

### 695 ***Cell culture***

696 HUVEC (C2519A, Lonza) were cultured in EBM-2 (CC-3162, Lonza)  
697 supplemented with the Endothelial Growth Medium (EGM-2) bullet kit (CC-3162, Lonza)  
698 and 1x antibiotic-antimycotic (Gibco). Normal human lung fibroblasts (CC2512, Lonza)  
699 were cultured in DMEM (Gibco) with 10% fetal bovine serum (FBS) and 1x antibiotic-  
700 antimycotic (Gibco). All cells were maintained at 37°C and 5% CO<sub>2</sub>. For contractility  
701 inhibition experiments, HUVEC were treated with 10µM (-) Blebbistatin (B0560-1MG,  
702 Sigma) for 15 min at 37°C or 10µM Y-27632 (10187-694, VWR) for 30 min at 37°C then  
703 immediately fixed in 4% PFA. For induction of contractility, HUVEC were treated with  
704 0.5U/ml thrombin (T7201-500UN, Sigma) for 10 min at 37°C. For microtubule  
705 depolymerization, HUVEC were treated with 10µM nocodazole (M1404, Sigma) for 20  
706 min at 37°C then immediately fixed in methanol.

707

### 708 ***siRNA knockdown***

709 HUVEC were transfected with non-targeting siRNA (NT, #4390847, Life  
710 Technologies), SUN1 siRNA #1 (439240, #s23630, Life Technologies), SUN1 siRNA #2  
711 (439240, #s23629, Life Technologies), GEF-H1 siRNA (439240, #s17546, Life  
712 Technologies), and/or nesprin-1 siRNA (M-014039-02-0005, Dharmacon) using  
713 Lipofectamine 2000 (11668027, Invitrogen) or Lipofectamine 3000 (L3000015,  
714 ThermoFisher). siRNA at 0.48µM in Opti-MEM (31985-070, Gibco) and a 1:20 dilution of  
715 Lipofectamine in Opti-MEM were incubated separately at RT for 5 min, then combined

716 and incubated at RT for 15 min. HUVEC were transfected at ~80% confluency with  
717 siRNA at 37°C for 24h, then recovered in EGM-2 for an additional 24h. HUVEC were  
718 seeded onto glass chamber slides coated with 5µg/ml fibronectin (F2006-2MG, Sigma)  
719 for experiments.

720

### 721 ***RNA sequencing and analysis***

722 RNA was extracted using TRIzol (15596018, Invitrogen) from 3 biological  
723 replicates (independent experiments) of HUVEC under static or homeostatic laminar  
724 flow (15d/cm<sup>2</sup>, 72hr) conditions, and KAPA mRNA HyperPrep Kit (7961901001, Roche)  
725 was used to prepare stranded libraries for sequencing (NovaSeq S1). 2–3 × 10<sup>7</sup>  
726 50-bp paired-end reads per sample were obtained and mapped to human genome  
727 GRCh38 downloaded from [https://support.10xgenomics.com/single-cell-gene-](https://support.10xgenomics.com/single-cell-gene-expression/software/pipelines/latest/advanced/references)  
728 [expression/software/pipelines/latest/advanced/references](https://support.10xgenomics.com/single-cell-gene-expression/software/pipelines/latest/advanced/references) with STAR using default  
729 settings (Dobin et al., 2013). Mapping rate was over 80% for all samples, and gene  
730 expression was determined with Htseq-count using the union mode  
731 (<https://htseq.readthedocs.io/en/master/>) (Putri et al., 2022). Differential expression  
732 analysis was performed with DESeq2 (Love et al., 2014) using default settings in R, and  
733 lists of differentially expressed genes were obtained (p adjusted < 0.1).

734

### 735 ***Immunofluorescence staining***

736 For experiments visualizing microtubules, HUVEC were fixed in ice-cold  
737 methanol for 10 min at 4°C. For all other experiments, HUVEC were fixed with 4% PFA  
738 for 10 min at RT and permeabilized with 0.1% Triton X-100 (T8787, Sigma) for 10 min  
739 at RT. Fixed HUVEC were blocked for 1h at RT in blocking solution (5% FBS, 2X  
740 antibiotic-antimycotic (Gibco), 0.1% sodium azide (s2002-100G, Sigma) in DPBS). Cells



741 were incubated in primary antibody overnight at 4°C, then washed 3X for 5 min in  
742 DPBS. Secondary antibody and DRAQ7 (1:1000, ab109202, Abcam), DAPI (0.3µM,  
743 10236276001, Sigma), and/or AlexaFluor488 Phalloidin (1:100, A12379, Life  
744 Technologies) were added for 1h at RT followed by 3X washes for 10 min each in  
745 DPBS. Slides were mounted with coverslips using Prolong Diamond Antifade mounting  
746 medium (P36961, Life Technology) and sealed with nail polish. Primary and secondary  
747 antibodies were diluted in blocking solution. The following primary antibodies were  
748 used: anti-VE-cadherin (1:500, 2500S, Cell Signaling), anti-SUN1 (1:500, ab124770,  
749 Abcam), anti-Ki67 (1:500, ab15580, Abcam), anti-phospho-myosin light chain 2  
750 (Thr18/Ser19) (1:500, 3674S, Cell Signaling), anti-alpha-tubulin (1:500, 3873S, Cell  
751 Signaling), anti-GEF-H1 (1:500, ab155785, Abcam), and anti-SYNE1 (1:500,  
752 HPA019113, Atlas Antibodies). The following secondary antibodies from Life  
753 Technologies were used: goat anti-mouse AlexaFluor 488 (1:500, A11029), goat anti-  
754 rabbit AlexaFluor 594 (1:500, A11037), goat anti-mouse 647 (1:500, A21236), and goat  
755 anti-rabbit 647 (1:500, A21245).

756

### 757 ***Western blotting***

758 Cells were scraped into RIPA buffer with protease/phosphatase inhibitor (5872S,  
759 Cell Signaling) then centrifuged at 13000 rpm at 4°C for 20 min. Lysate was reduced in  
760 sample loading buffer and dithiothreitol (R0861, Thermo Fisher) and boiled for 10 min at  
761 100°C. Samples were stored at -20°C until use. 10µg of sample were run on a 10%  
762 stain-free polyacrylamide gel (161-0183, BioRad) then transferred onto a PVDF  
763 membrane on ice for 1.5h. Membranes were blocked in OneBlock (20-313,  
764 Promethues) for 1 h at RT then washed 3X in PBST. Anti-GEF-H1 (1:1000, ab155785,  
765 Abcam), anti-VE-cadherin (1:14,000, 2500S, Cell Signaling), or anti-GAPDH (1:5000,



766 97166S, Cell Signaling) was added overnight at 4°C. Membranes were washed 3X in  
767 PBST then donkey anti-rabbit HRP secondary antibody (1:10,000, A16035, Thermo  
768 Fisher) was added for 1h at RT. Immobilon Forte HRP Substrate (WBLUF0100,  
769 Millipore Sigma) was added for 30 sec. Blots were exposed for 8 sec.

770

### 771 ***EdU labeling***

772 HUVEC were labeled with EdU using the Click-It EdU Kit 488 (Invitrogen,  
773 C10337) and fixed according to the manufacturer's instructions. Cells positive for EdU  
774 labeling were counted and compared to total cell number to obtain percent positive.

775

### 776 ***Junction analysis***

777 Endothelial cell adherens junctions were quantified in monolayers using Fiji to  
778 generate 15µm line scans of VE-cadherin signal parallel to the cell junctions. VE-  
779 cadherin signal was integrated to obtain the area under the curve. Linear junctions with  
780 consistent VE-cadherin signal thus had a large area under the curve, while more  
781 serrated junctions had reduced area under the curve (**Fig S3e**). Measurements were  
782 performed on at least 9 cells per field of view, with 3-6 fields of view per condition.

783

### 784 ***Real time cell analysis (RTCA)***

785 Barrier function was assessed using the xCELLigence Real-Time Cell Analyzer  
786 (RTCA, Acea Biosciences/Roche Applied Science) to measure electrical impedance  
787 across HUVEC monolayers seeded onto microelectrodes. HUVEC were seeded to  
788 confluency on the microelectrodes of the E-plate (E-plate 16, Roche Applied Science).  
789 Electrical impedance readings were taken every 2 min for 5h. The percent change in

790 cell index was obtained at the 5h timepoint using the following formula: (Cell Index<sub>SUN1</sub>-  
791 Cell Index<sub>NT</sub>)/ABS(Cell Index<sub>NT</sub>).

792

### 793 ***Flow experiments***

794 Flow experiments were performed using an Ibidi pump system (10902, Ibidi) as  
795 described (Ruter et al., 2021). HUVEC were seeded onto fibronectin coated Ibidi slides  
796 (either  $\mu$ -Slide I Luer I 0.4 mm (80176, Ibidi) or  $\mu$ -Slide Y-shaped (80126, Ibidi) in flow  
797 medium (EBM-2 with 10% FBS and 1x Antibiotic-antimycotic). HUVEC were exposed to  
798 laminar shear stress for 30 min at 5 dyn/cm<sup>2</sup>, followed by 30 min at 10 dyn/cm<sup>2</sup>, and  
799 finally for 72 h at 15 dyn/cm<sup>2</sup>. Alignment was measured by taking the ratio of the  
800 longitudinal axis to the transverse axis relative to the flow vector. At least 10 cells were  
801 measured per condition per experiment. Vascular permeability *in vitro* was determined  
802 using the biotin matrix labeling assay as described below.

803

### 804 ***Biotin matrix labeling assay***

805 Labeling of biotinylated matrix was assessed as described (Dubrovskiy et al.,  
806 2013). Briefly, fibronectin was biotinylated by incubating 0.1mg/mL fibronectin with  
807 0.5mM EZ-Link Sulfo-NHS-LC-Biotin (A39257, ThermoFisher) for 30 min at RT. Glass  
808 chamber slides were coated with 5 $\mu$ g/ml biotinylated-fibronectin and HUVEC were  
809 seeded on top. At confluency, HUVEC were treated with 25 $\mu$ g/mL Streptavidin-488  
810 (S11223, Invitrogen) for 3 min then immediately fixed. For quantification, Fiji was used  
811 to threshold the streptavidin signal, and the streptavidin area was measured and  
812 normalized for total area for at least 3 fields of view per experiment.

813

814 ***Junction reformation assay***

815           The EDTA junction reformation assay was performed as previously described  
816 (Wright et al., 2015). Briefly, HUVEC were treated with 3mM EDTA (EDS-100G, Sigma-  
817 Aldrich) for 1h at 37°C. EDTA was then washed out 3X with DPBS, incubation at 37°C  
818 in EGM-2 was continued, and cells were fixed at 0 min, 20 min, 40 min, and 60 min  
819 intervals.

820

821 ***VE-cadherin internalization***

822           VE-cadherin internalization was performed as described (Wylie et al., 2018).  
823 Briefly, HUVEC were plated on 5µg/ml fibronectin and grown to confluency. After  
824 overnight serum starvation (Opti-MEM (31985-070, Gibco) supplemented with 1% FBS  
825 (F2442, Sigma), and 1x antibiotic-antimycotic (Gibco)), cells were washed with pre-  
826 chilled PBS+ (14040182, ThermoFisher) on ice at 4°C, then incubated in ice-cold  
827 blocking solution (EBM-2 (CC-3162, Lonza) supplemented with 0.5% BSA (A4503,  
828 Sigma)) for 30 min at 4°C. HUVEC were then incubated with VE-cadherin BV6 antibody  
829 (1:100, ALX-803-305-C100, Enzo) in blocking solution for 2h on ice at 4°C. Following  
830 VE-cadherin labeling, cells were washed with PBS+ then incubated in pre-warmed  
831 internalization medium (EBM-2) at 37°C for 1h. Finally, HUVEC were incubated in acid  
832 wash (0.5M NaCl/0.2M acetic acid) for 4 min at 4°C to remove remaining labeled VE-  
833 cadherin on the cell surface, then washed with PBS+ and fixed. For quantification,  
834 internalized VE-cadherin area was measured in Fiji, then normalized to total cell area  
835 for at least 9 cells per experiment.

836

837 ***Microtubule analysis***

838 For nuclear microtubule analysis, an ROI was drawn in Fiji over the nucleus. Fiji  
839 was used to threshold  $\alpha$ -tubulin signal, and the area of the signal was measured within  
840 the ROI. This was performed on 8 cells per field of view, with 3-6 fields per condition per  
841 experiment. For high-resolution microtubule analysis, high-resolution confocal images  
842 were acquired with a Zeiss 880 Confocal with AiryScan FAST microscope with GaAsP  
843 detector and camera (Zeiss) using a Plan-Apo 63x oil immersion objective (NA 1.40)  
844 and 488nm and 561nm lasers. Imaging was performed at RT, and images were  
845 acquired with the Zeiss 880 software and with the AiryScan detector. Images were then  
846 processed with AiryScan. All image analysis, including Z-stack compression, was  
847 performed in Fiji. For microtubule density, an ROI was drawn at the MTOC and the cell  
848 periphery. Fiji was used to threshold  $\alpha$ -tubulin signal, and the area of the signal was  
849 measured within the ROI. This was performed on at least 10 cells per condition per  
850 experiment. For junction analysis, the number of contacts between  $\alpha$ -tubulin and VE-  
851 cadherin were counted and normalized to the junction length. At least 15 junctions were  
852 measured per condition per experiment.

853

854 ***Microtubule tip tracking***

855 HUVEC were infected with an EB3-mCherry Lentivirus (Kushner et al., 2014) for  
856 24h to visualize microtubule comets. Following infection, HUVEC were incubated with  
857 siRNAs for NT or SUN1. For live imaging, cells were incubated at 37°C in a stage-top  
858 incubator (TOKAI HIT, WSKM). Images were acquired on an Andor XD spinning disk  
859 confocal microscope based on a CSU-X1 Yokogawa head with an Andor iXon 897 EM-  
860 CCD camera. A 561nm laser and FF01-607/36 emission filter were used. Images were  
861 acquired with a 470ms exposure and 32ms readout time for 2 min (240 frames) using a

862 UPlanSApo 60x silicone-oil immersion objective (NA 1.30) and Metamorph software.  
863 Microtubules at the cell periphery were tracked using the Manual Tracking plugin in Fiji  
864 and were tracked for at least 60 frames (30 sec). Track information was acquired from  
865 the x and y coordinates using a custom algorithm in Visual Basic in Excel provided by  
866 Dan Buster at the University of Arizona. 10 microtubule tracks were measured per cell.  
867

### 868 ***GEF-H1 analysis***

869 For GEF-H1 localization analysis, an ROI was drawn at the periphery of the cell,  
870 and the  $\alpha$ -tubulin signal was used to create a mask. Mean signal intensity was then  
871 measured for GEF-H1 within the  $\alpha$ -tubulin mask and outside of it, and a ratio was taken.  
872 At least 9 cells were analyzed per condition per experiment.  
873

### 874 ***Statistics***

875 Student's two-tailed unpaired *t*-test was used to determine statistical significance  
876 in experiments with 2 groups and one-way ANOVA with Tukey's multiple comparisons  
877 test was used in experiments with 3 groups. For thrombin, blebbistatin, Y-27632, and  
878 nocodazole experiments, two-way ANOVA with Tukey's multiple comparisons test was  
879 used to determine statistical significance.  $X^2$  was used for categorical data. For box and  
880 whisker plots, boxes represent the upper quartile, lower quartile, and median; whiskers  
881 represent the minimum and maximum values. Statistical tests and graphs were made  
882 using the Prism 9 software (GraphPad Software).  
883

### 884 ***Data availability***

885 The RNA-seq data that support the findings of this study are available in the  
886 Gene Expression Omnibus (GEO) under the accession number GSE213099.

887

888 **ACKNOWLEDGMENTS**

889           We thank Michelle Altemara and staff at the Zebrafish Aquaculture Core and  
890 Kaitlyn Quigley for fish room support, Aaron Friedman and Caroline Crater for mouse  
891 room support, and Yosuke Mukouyama, Nick Buglak, and Bautch Lab members for  
892 critical discussion and feedback. We also thank Dan Buster for the software used in  
893 microtubule tip tracking experiments and Angelika Noegel for sharing RNASeq data with  
894 us. Airy Scan imaging was performed at the UNC Hooker Imaging Core Facility and  
895 microtubule tip tracking imaging was performed with Pablo Ariel at the UNC Microscopy  
896 Services Laboratory, supported in part by P30 CA016086 Cancer Center Core Support  
897 Grant to the UNC Lineberger Comprehensive Cancer Center.

898

899 **AUTHOR CONTRIBUTIONS**

900           Danielle B Buglak (DBB) and Victoria L Bautch (VLB) conceptualized the work;  
901 DBB, Ariel L Gold (ALG), Allison P Marvin (APM), Shea N Ricketts (SNR), Molly R  
902 Kulikauskas (MRK), Andrew Burciu (AB), Karina Kinghorn (KK), Morgan Oatley (MO),  
903 Natalie T Tanke (NTT), Pauline Bougaran (PB), and Bryan N Johnson (BNJ) performed  
904 and analyzed experiments; Ziqing Liu (ZL) analyzed RNASeq data; DBB and VLB wrote  
905 and edited the manuscript; Celia E Shiau (CES) provided oversight on zebrafish  
906 experiments; Stephen L Rogers (SLR) provided oversight and discussion on  
907 microtubule and GEF-H1 experiments; VLB provided study supervision and oversight.

908

909 **FUNDING**

910           This work was supported by grants from the National Institutes of Health (R35  
911 HL139950 to VLB), the Integrated Vascular Biology Training Grant (5T32HL069768-17,

912 DBB), and an American Heart Association Predoctoral Fellowship (19PRE34380887 to  
913 DBB).

914

915 **DECLARATION OF INTERESTS:** None.

916

917

918 **REFERENCES**

919

920 Abu Taha, A., & Schnittler, H.-J. (2014). Dynamics between actin and the VE-  
921 cadherin/catenin complex: novel aspects of the ARP2/3 complex in regulation of  
922 endothelial junctions. *Cell Adhesion & Migration*, 8(2), 125–135.  
923 <https://doi.org/10.4161/cam.28243>

924 Angulo-Urarte, A., Casado, P., Castillo, S. D., Kobialka, P., Kotini, M. P., Figueiredo, A.  
925 M., Castel, P., Rajeeve, V., Milà-Guasch, M., Millan, J., et al. (2018). Endothelial  
926 cell rearrangements during vascular patterning require PI3-kinase-mediated  
927 inhibition of actomyosin contractility. *Nature Communications*, 9(1), 4826.  
928 <https://doi.org/10.1038/s41467-018-07172-3>

929 Anno, T., Sakamoto, N., & Sato, M. (2012). Role of nesprin-1 in nuclear deformation in  
930 endothelial cells under static and uniaxial stretching conditions. *Biochemical and*  
931 *Biophysical Research Communications*, 424(1), 94–99.  
932 <https://doi.org/10.1016/j.bbrc.2012.06.073>

933 Arganda-Carreras, I., Fernández-González, R., Muñoz-Barrutia, A., & Ortiz-De-  
934 Solorzano, C. (2010). 3D reconstruction of histological sections: Application to  
935 mammary gland tissue. *Microscopy Research and Technique*, 73(11), 1019–1029.  
936 <https://doi.org/10.1002/jemt.20829>

937 Banerjee, I., Zhang, J., Moore-Morris, T., Pfeiffer, E., Buchholz, K. S., Liu, A., Ouyang,  
938 K., Stroud, M. J., Gerace, L., Evans, S. M., et al. (2014). Targeted ablation of  
939 nesprin 1 and nesprin 2 from murine myocardium results in cardiomyopathy,  
940 altered nuclear morphology and inhibition of the biomechanical gene response.  
941 *PLoS Genetics*, 10(2), e1004114. <https://doi.org/10.1371/journal.pgen.1004114>

942 Bautch, V. L., & Caron, K. M. (2015). Blood and lymphatic vessel formation. *Cold Spring*  
943 *Harbor Perspectives in Biology*, 7(3), a008268.  
944 <https://doi.org/10.1101/cshperspect.a008268>

945 Bellett, G., Carter, J. M., Keynton, J., Goldspink, D., James, C., Moss, D. K., &  
946 Mogensen, M. M. (2009). Microtubule plus-end and minus-end capture at adherens  
947 junctions is involved in the assembly of apico-basal arrays in polarised epithelial  
948 cells. *Cell Motility and the Cytoskeleton*, 66(10), 893–908.  
949 <https://doi.org/10.1002/cm.20393>

950 Bentley, K., Franco, C. A., Philippides, A., Blanco, R., Dierkes, M., Gebala, V., Stanchi,  
951 F., Jones, M., Aspalter, I. M., Cagna, G., et al. (2014). The role of differential VE-  
952 cadherin dynamics in cell rearrangement during angiogenesis. *Nature Cell Biology*,  
953 16(4), 309–321.

954 Birkenfeld, J., Nalbant, P., Yoon, S.-H., & Bokoch, G. M. (2008). Cellular functions of  
955 GEF-H1, a microtubule-regulated Rho-GEF: is altered GEF-H1 activity a crucial  
956 determinant of disease pathogenesis? *Trends in Cell Biology*, 18(5), 210–219.  
957 <https://doi.org/10.1016/j.tcb.2008.02.006>



- 958 Birukova, A. A., Adyshev, D., Gorshkov, B., Bokoch, G. M., Birukov, K. G., & Verin, A.  
959 D. (2006). GEF-H1 is involved in agonist-induced human pulmonary endothelial  
960 barrier dysfunction. *American Journal of Physiology. Lung Cellular and Molecular*  
961 *Physiology*, 290(3), L540-8. <https://doi.org/10.1152/ajplung.00259.2005>
- 962 Birukova, A. A., Liu, F., Garcia, J. G. N., & Verin, A. D. (2004). Protein kinase A  
963 attenuates endothelial cell barrier dysfunction induced by microtubule disassembly.  
964 *American Journal of Physiology. Lung Cellular and Molecular Physiology*, 287(1),  
965 L86-93. <https://doi.org/10.1152/ajplung.00441.2003>
- 966 Blum, Y., Belting, H.-G., Ellertsdottir, E., Herwig, L., Lüders, F., & Affolter, M. (2008).  
967 Complex cell rearrangements during intersegmental vessel sprouting and vessel  
968 fusion in the zebrafish embryo. *Developmental Biology*, 316(2), 312–322.  
969 <https://doi.org/10.1016/j.ydbio.2008.01.038>
- 970 Buglak, D. B., Kushner, E. J., Marvin, A. P., Davis, K. L., & Bautch, V. L. (2020). Excess  
971 centrosomes disrupt vascular lumenization and endothelial cell adherens junctions.  
972 *Angiogenesis*, 23(4), 567–575. <https://doi.org/10.1007/s10456-020-09737-7>
- 973 Capell, B. C., & Collins, F. S. (2006). Human laminopathies: nuclei gone genetically  
974 awry. *Nature Reviews. Genetics*, 7(12), 940–952. <https://doi.org/10.1038/nrg1906>
- 975 Carley, E., King, M. C., & Guo, S. (2022). Integrating mechanical signals into cellular  
976 identity. *Trends in Cell Biology*, 32(8), 669–680.  
977 <https://doi.org/10.1016/j.tcb.2022.02.006>
- 978 Carley, E., Stewart, R. M., Zieman, A., Jalilian, I., King, D. E., Zubek, A., Lin, S.,  
979 Horsley, V., & King, M. C. (2021). The LINC complex transmits integrin-dependent  
980 tension to the nuclear lamina and represses epidermal differentiation. *ELife*, 10.  
981 <https://doi.org/10.7554/eLife.58541>
- 982 Carmeliet, P., & Jain, R. K. (2011). Principles and mechanisms of vessel normalization  
983 for cancer and other angiogenic diseases. *Nature Reviews Drug Discovery*, 10,  
984 417–427.
- 985 Carmeliet, P., Lampugnani, M. G., Moons, L., Breviario, F., Compernelle, V., Bono, F.,  
986 Balconi, G., Spagnuolo, R., Oosthuysen, B., Dewerchin, M., et al. (1999). Targeted  
987 deficiency or cytosolic truncation of the VE-cadherin gene in mice impairs VEGF-  
988 mediated endothelial survival and angiogenesis. *Cell*, 98(147–157).
- 989 Chancellor, T. J., Lee, J., Thodeti, C. K., & Lele, T. (2010). Actomyosin tension exerted  
990 on the nucleus through nesprin-1 connections influences endothelial cell adhesion,  
991 migration, and cyclic strain-induced reorientation. *Biophysical Journal*, 99(1), 115–  
992 123. <https://doi.org/10.1016/j.bpj.2010.04.011>
- 993 Chang, W., Wang, Y., Luxton, G. W. G., Östlund, C., Worman, H. J., & Gundersen, G.  
994 G. (2019). Imbalanced nucleocytoskeletal connections create common polarity  
995 defects in progeria and physiological aging. *Proceedings of the National Academy*  
996 *of Sciences of the United States of America*, 116(9), 3578–3583.  
997 <https://doi.org/10.1073/pnas.1809683116>

- 998 Chen, C.-Y., Chi, Y.-H., Mutalif, R. A., Starost, M. F., Myers, T. G., Anderson, S. A.,  
999 Stewart, C. L., & Jeang, K.-T. (2012). Accumulation of the Inner Nuclear Envelope  
1000 Protein Sun1 Is Pathogenic in Progeric and Dystrophic Laminopathies. *Cell*, *149*(3),  
1001 565–577. <https://doi.org/10.1016/j.cell.2012.01.059>
- 1002 Chen, Z.-J., Wang, W.-P., Chen, Y.-C., Wang, J.-Y., Lin, W.-H., Tai, L.-A., Liou, G.-G.,  
1003 Yang, C.-S., & Chi, Y.-H. (2014). Dysregulated interactions between lamin A and  
1004 SUN1 induce abnormalities in the nuclear envelope and endoplasmic reticulum in  
1005 progeric laminopathies. *Journal of Cell Science*, *127*(Pt 8), 1792–1804.  
1006 <https://doi.org/10.1242/jcs.139683>
- 1007 Chong, D. C., Yu, Z., Brighton, H. E., Bear, J. E., & Bautch, V. L. (2017). Tortuous  
1008 Microvessels Contribute to Wound Healing via Sprouting Angiogenesis.  
1009 *Arteriosclerosis, Thrombosis, and Vascular Biology*, *37*(10), 1903–1912.  
1010 <https://doi.org/10.1161/ATVBAHA.117.309993>
- 1011 Claesson-Welsh, L. (2015). Vascular permeability--the essentials. *Upsala Journal of*  
1012 *Medical Sciences*, *120*(3), 135–143.  
1013 <https://doi.org/10.3109/03009734.2015.1064501>
- 1014 Claesson-Welsh, L., Dejana, E., & McDonald, D. M. (2021). Permeability of the  
1015 Endothelial Barrier: Identifying and Reconciling Controversies. *Trends in Molecular*  
1016 *Medicine*, *27*(4), 314–331. <https://doi.org/10.1016/j.molmed.2020.11.006>
- 1017 Conway, D. E., Williams, M. R., Eskin, S. G., & McIntire, L. V. (2010). Endothelial cell  
1018 responses to atheroprone flow are driven by two separate flow components: low  
1019 time-average shear stress and fluid flow reversal. *American Journal of Physiology.*  
1020 *Heart and Circulatory Physiology*, *298*(2), H367-74.  
1021 <https://doi.org/10.1152/ajpheart.00565.2009>
- 1022 De Sandre-Giovannoli, A. (2003). Lamin A Truncation in Hutchinson-Gilford Progeria.  
1023 *Science*, *300*(5628), 2055–2055. <https://doi.org/10.1126/science.1084125>
- 1024 Dejana, E. (2004). Endothelial cell-cell junctions: happy together. *Nature Reviews.*  
1025 *Molecular Cell Biology*, *5*(4), 261–270. <https://doi.org/10.1038/nrm1357>
- 1026 Dejana, E., & Vestweber, D. (2013). The role of VE-cadherin in vascular morphogenesis  
1027 and permeability control. *Progress in Molecular Biology and Translational Science*,  
1028 *116*, 119–144. <https://doi.org/10.1016/B978-0-12-394311-8.00006-6>
- 1029 DeLisser, H. M. (2011). Modulators of endothelial cell filopodia: PECAM-1 joins the club.  
1030 *Cell Adhesion & Migration*, *5*(1), 37–41. <https://doi.org/10.4161/cam.5.1.13575>
- 1031 Denis, K. B., Cabe, J. I., Danielsson, B. E., Tieu, K. V, Mayer, C. R., & Conway, D. E.  
1032 (2021). The LINC complex is required for endothelial cell adhesion and adaptation  
1033 to shear stress and cyclic stretch. *Molecular Biology of the Cell*, mbcE20110698.  
1034 <https://doi.org/10.1091/mbc.E20-11-0698>
- 1035 Dobin, A., Davis, C. A., Schlesinger, F., Drenkow, J., Zaleski, C., Jha, S., Batut, P.,  
1036 Chaisson, M., & Gingeras, T. R. (2013). STAR: ultrafast universal RNA-seq aligner.

- 1037 Bioinformatics (Oxford, England), 29(1), 15–21.  
1038 <https://doi.org/10.1093/bioinformatics/bts635>
- 1039 Dubrovskiy, O., Birukova, A. A., & Birukov, K. G. (2013). Measurement of local  
1040 permeability at subcellular level in cell models of agonist- and ventilator-induced  
1041 lung injury. *Laboratory Investigation; a Journal of Technical Methods and*  
1042 *Pathology*, 93(2), 254–263. <https://doi.org/10.1038/labinvest.2012.159>
- 1043 Eriksson, M., Brown, W. T., Gordon, L. B., Glynn, M. W., Singer, J., Scott, L., Erdos, M.  
1044 R., Robbins, C. M., Moses, T. Y., Berglund, P., et al. (2003). Recurrent de novo  
1045 point mutations in lamin A cause Hutchinson-Gilford progeria syndrome. *Nature*,  
1046 423(6937), 293–298. <https://doi.org/10.1038/nature01629>
- 1047 Esser, S., Lampugnani, M. G., Corada, M., Dejana, E., & Risau, W. (1998). Vascular  
1048 endothelial growth factor induces VE-cadherin tyrosine phosphorylation in  
1049 endothelial cells. *Journal of Cell Science*, 111 ( Pt 1), 1853–1865. Retrieved from  
1050 <http://www.ncbi.nlm.nih.gov/pubmed/9625748>
- 1051 Fridolfsson, H. N., Ly, N., Meyerzon, M., & Starr, D. A. (2010). UNC-83 coordinates  
1052 kinesin-1 and dynein activities at the nuclear envelope during nuclear migration.  
1053 *Developmental Biology*, 338(2), 237–250.  
1054 <https://doi.org/10.1016/j.ydbio.2009.12.004>
- 1055 Gimpel, P., Lee, Y. L., Sobota, R. M., Calvi, A., Koullourou, V., Patel, R., Mamchaoui,  
1056 K., Nédélec, F., Shackleton, S., Schmoranzner, J., et al. (2017). Nesprin-1 $\alpha$ -  
1057 Dependent Microtubule Nucleation from the Nuclear Envelope via Akap450 Is  
1058 Necessary for Nuclear Positioning in Muscle Cells. *Current Biology : CB*, 27(19),  
1059 2999-3009.e9. <https://doi.org/10.1016/j.cub.2017.08.031>
- 1060 Graham, D. M., Andersen, T., Sharek, L., Uzer, G., Rotherberg, K., Hoffman, B. D.,  
1061 Rubin, J., Balland, M., Bear, J. E., & Burrige, K. (2018). Enucleated cells reveal  
1062 differential roles of the nucleus in cell migration, polarity, and mechanotransduction.  
1063 *Journal of Cell Biology*, jcb.201706097.
- 1064 Guilluy, C., Osborne, L. D., Van Landeghem, L., Sharek, L., Superfine, R., Garcia-Mata,  
1065 R., & Burrige, K. (2014). Isolated nuclei adapt to force and reveal a  
1066 mechanotransduction pathway in the nucleus. *Nature Cell Biology*, 16(4), 376–381.  
1067 <https://doi.org/10.1038/ncb2927>
- 1068 Han, Y., Wang, L., Yao, Q.-P., Zhang, P., Liu, B., Wang, G.-L., Shen, B.-R., Cheng, B.,  
1069 Wang, Y., Jiang, Z.-L., et al. (2015). Nuclear envelope proteins Nesprin2 and  
1070 LaminA regulate proliferation and apoptosis of vascular endothelial cells in  
1071 response to shear stress. *Biochimica et Biophysica Acta*, 1853(5), 1165–1173.  
1072 <https://doi.org/10.1016/j.bbamcr.2015.02.013>
- 1073 Haque, F., Lloyd, D. J., Smallwood, D. T., Dent, C. L., Shanahan, C. M., Fry, A. M.,  
1074 Trembath, R. C., & Shackleton, S. (2006). SUN1 interacts with nuclear lamin A and  
1075 cytoplasmic nesprins to provide a physical connection between the nuclear lamina  
1076 and the cytoskeleton. *Molecular and Cellular Biology*, 26(10), 3738–3751.

- 1077 Haque, F., Mazzeo, D., Patel, J. T., Smallwood, D. T., Ellis, J. A., Shanahan, C. M., &  
1078 Shackleton, S. (2010). Mammalian SUN protein interaction networks at the inner  
1079 nuclear membrane and their role in laminopathy disease processes. *The Journal of*  
1080 *Biological Chemistry*, *285*(5), 3487–3498. <https://doi.org/10.1074/jbc.M109.071910>
- 1081 Hellström, M., Phng, L.-K., Hofmann, J. J., Wallgard, E., Coultas, L., Lindblom, P., Alva,  
1082 J., Nilsson, A.-K., Karlsson, L., Gaiano, N., et al. (2007). Dll4 signalling through  
1083 Notch1 regulates formation of tip cells during angiogenesis. *Nature*, *445*(7129),  
1084 776–780. <https://doi.org/10.1038/nature05571>
- 1085 Huang, C., Sheikh, F., Hollander, M., Cai, C., Becker, D., Chu, P.-H., Evans, S., &  
1086 Chen, J. (2003). Embryonic atrial function is essential for mouse embryogenesis,  
1087 cardiac morphogenesis and angiogenesis. *Development (Cambridge, England)*,  
1088 *130*(24), 6111–6119. <https://doi.org/10.1242/dev.00831>
- 1089 Hübner, K., Cabochette, P., Diéguez-Hurtado, R., Wiesner, C., Wakayama, Y.,  
1090 Grassme, K. S., Hubert, M., Guenther, S., Belting, H.-G., Affolter, M., et al. (2018).  
1091 Wnt/ $\beta$ -catenin signaling regulates VE-cadherin-mediated anastomosis of brain  
1092 capillaries by counteracting S1pr1 signaling. *Nature Communications*, *9*(1), 4860.  
1093 <https://doi.org/10.1038/s41467-018-07302-x>
- 1094 Huveneers, S., Oldenburg, J., Spanjaard, E., van der Krogt, G., Grigoriev, I.,  
1095 Akhmanova, A., Rehmann, H., & de Rooij, J. (2012). Vinculin associates with  
1096 endothelial VE-cadherin junctions to control force-dependent remodeling. *The*  
1097 *Journal of Cell Biology*, *196*(5), 641–652. <https://doi.org/10.1083/jcb.201108120>
- 1098 Juettner, V. V., Kruse, K., Dan, A., Vu, V. H., Khan, Y., Le, J., Leckband, D., Komarova,  
1099 Y., & Malik, A. B. (2019). VE-PTP stabilizes VE-cadherin junctions and the  
1100 endothelial barrier via a phosphatase-independent mechanism. *The Journal of Cell*  
1101 *Biology*, *218*(5), 1725–1742. <https://doi.org/10.1083/jcb.201807210>
- 1102 Ketema, M., Wilhelmsen, K., Kuikman, I., Janssen, H., Hodzic, D., & Sonnenberg, A.  
1103 (2007). Requirements for the localization of nesprin-3 at the nuclear envelope and  
1104 its interaction with plectin. *Journal of Cell Science*, *120*(Pt 19), 3384–3394.  
1105 <https://doi.org/10.1242/jcs.014191>
- 1106 King, S. J., Nowak, K., Suryavanshi, N., Holt, I., Shanahan, C. M., & Ridley, A. J.  
1107 (2014). Nesprin-1 and nesprin-2 regulate endothelial cell shape and migration.  
1108 *Cytoskeleton (Hoboken, N.J.)*, *71*(7), 423–434. <https://doi.org/10.1002/cm.21182>
- 1109 Komarova, Y. A., Huang, F., Geyer, M., Daneshjou, N., Garcia, A., Idalino, L., Kreutz,  
1110 B., Mehta, D., & Malik, A. B. (2012). VE-cadherin signaling induces EB3  
1111 phosphorylation to suppress microtubule growth and assemble adherens junctions.  
1112 *Molecular Cell*, *48*(6), 914–925.
- 1113 Komarova, Y., Lansbergen, G., Galjart, N., Grosveld, F., Borisov, G. G., & Akhmanova,  
1114 A. (2005). EB1 and EB3 control CLIP dissociation from the ends of growing  
1115 microtubules. *Molecular Biology of the Cell*, *16*(11), 5334–5345.  
1116 <https://doi.org/10.1091/mbc.e05-07-0614>

- 1117 Krendel, M., Zenke, F. T., & Bokoch, G. M. (2002). Nucleotide exchange factor GEF-H1  
1118 mediates cross-talk between microtubules and the actin cytoskeleton. *Nature Cell*  
1119 *Biology*, 4(4), 294–301. <https://doi.org/10.1038/ncb773>
- 1120 Kushner, E. J., & Bautch, V. L. (2013). Building blood vessels in development and  
1121 disease. *Current Opinion in Hematology*, 20(3), 231–236.  
1122 <https://doi.org/10.1097/MOH.0b013e328360614b>
- 1123 Kushner, E. J., Ferro, L. S., Liu, J.-Y., Durrant, J. R., Rogers, S. L., Dudley, A. C., &  
1124 Bautch, V. L. (2014). Excess centrosomes disrupt endothelial migration via  
1125 centrosome scattering. *Journal of Cell Biology*, 206(2), 257–272.
- 1126 Kushner, E. J., Ferro, L. S., Yu, Z., & Bautch, V. L. (2016). Excess centrosomes perturb  
1127 dynamic endothelial cell repolarization during blood vessel formation. *Molecular*  
1128 *Biology of the Cell*, 27(12), 1911–1920.
- 1129 Lei, K., Zhang, X., Ding, X., Guo, X., Chen, M., Zhu, B., Xu, T., Zhuang, Y., Xu, R., &  
1130 Han, M. (2009). SUN1 and SUN2 play critical but partially redundant roles in  
1131 anchoring nuclei in skeletal muscle cells in mice. *PNAS*, 106(25), 10207–10212.
- 1132 Li, P., Stumpf, M., Müller, R., Eichinger, L., Glöckner, G., & Noegel, A. A. (2017). The  
1133 function of the inner nuclear envelope protein SUN1 in mRNA export is regulated  
1134 by phosphorylation. *Scientific Reports*, 7(1), 9157. <https://doi.org/10.1038/s41598-017-08837-7>
- 1136 Ligon, L. A., Karki, S., Tokito, M., & Al, E. (2001). Dynein binds to beta-catenin and may  
1137 tether microtubules at adherens junctions. *Nature Cell Biology*, 3, 913–917.
- 1138 Linkert, M., Rueden, C. T., Allan, C., Burel, J.-M., Moore, W., Patterson, A., Loranger,  
1139 B., Moore, J., Neves, C., MacDonald, D., et al. (2010). Metadata matters: access to  
1140 image data in the real world. *Journal of Cell Biology*, 189(5), 777–782.  
1141 <https://doi.org/10.1083/jcb.201004104>
- 1142 Liu, Z., Ruter, D. L., Quigley, K., Tanke, N. T., Jiang, Y., & Bautch, V. L. (2021). Single-  
1143 Cell RNA Sequencing Reveals Endothelial Cell Transcriptome Heterogeneity Under  
1144 Homeostatic Laminar Flow. *Arteriosclerosis, Thrombosis, and Vascular Biology*,  
1145 41(10), 2575–2584. <https://doi.org/10.1161/ATVBAHA.121.316797>
- 1146 Love, M. I., Huber, W., & Anders, S. (2014). Moderated estimation of fold change and  
1147 dispersion for RNA-seq data with DESeq2. *Genome Biology*, 15(12), 550.  
1148 <https://doi.org/10.1186/s13059-014-0550-8>
- 1149 Maurya, M. R., Gupta, S., Li, J. Y.-S., Ajami, N. E., Chen, Z. B., Shyy, J. Y.-J., Chien,  
1150 S., & Subramaniam, S. (2021). Longitudinal shear stress response in human  
1151 endothelial cells to atheroprone and atheroprotective conditions. *Proceedings of the*  
1152 *National Academy of Sciences of the United States of America*, 118(4).  
1153 <https://doi.org/10.1073/pnas.2023236118>
- 1154 Mavria, G., Vercoulen, Y., Yeo, M., Paterson, H., Karasarides, M., Marais, R., Bird, D.,  
1155 & Marshall, C. J. (2006). ERK-MAPK signaling opposes Rho-kinase to promote



- 1156 endothelial cell survival and sprouting during angiogenesis. *Cancer Cell*, 9(1), 33–  
1157 44. <https://doi.org/10.1016/j.ccr.2005.12.021>
- 1158 May, C. K., & Carroll, C. W. (2018). Differential incorporation of SUN-domain proteins  
1159 into LINC complexes is coupled to gene expression. *PLoS One*, 13(5), e0197621.  
1160 <https://doi.org/10.1371/journal.pone.0197621>
- 1161 McGee, M. D., Rillo, R., Anderson, A. S., & Starr, D. A. (2006). UNC-83 IS a KASH  
1162 protein required for nuclear migration and is recruited to the outer nuclear  
1163 membrane by a physical interaction with the SUN protein UNC-84. *Molecular  
1164 Biology of the Cell*, 17(4), 1790–1801. <https://doi.org/10.1091/mbc.e05-09-0894>
- 1165 Meng, W., Mushika, Y., Ichii, T., & Takeichi, M. (2008). Anchorage of microtubule minus  
1166 ends to adherens junctions regulates epithelial cell-cell contacts. *Cell*, 135(5), 948–  
1167 959. <https://doi.org/10.1016/j.cell.2008.09.040>
- 1168 Meyerzon, M., Fridolfsson, H. N., Ly, N., McNally, F. J., & Starr, D. A. (2009). UNC-83 is  
1169 a nuclear-specific cargo adaptor for kinesin-1-mediated nuclear migration.  
1170 *Development (Cambridge, England)*, 136(16), 2725–2733.  
1171 <https://doi.org/10.1242/dev.038596>
- 1172 Montero-Balaguer, M., Swirsding, K., Orsenigo, F., Cotelli, F., Mione, M., & Dejana, E.  
1173 (2009). Stable vascular connections and remodeling require full expression of VE-  
1174 cadherin in zebrafish embryos. *PLoS One*, 4(6), e5772.  
1175 <https://doi.org/10.1371/journal.pone.0005772>
- 1176 Morgan, J. T., Pfeiffer, E. R., Thirkill, T. L., Kumar, P., Peng, G., Fridolfsson, H. N.,  
1177 Douglas, G. C., Starr, D. A., & Barakat, A. I. (2011). Nesprin-3 regulates endothelial  
1178 cell morphology, perinuclear cytoskeletal architecture, and flow-induced  
1179 polarization. *Molecular Biology of the Cell*, 22(22), 4324–4334.  
1180 <https://doi.org/10.1091/mbc.E11-04-0287>
- 1181 Nakatsu, M. N., & Hughes, C. C. W. (2008). An optimized three-dimensional in vitro  
1182 model for the analysis of angiogenesis. *Methods in Enzymology*, 443, 65–82.
- 1183 Nesmith, J. E., Chappell, J. C., Cluceru, J. G., & Bautch, V. L. (2017). Blood vessel  
1184 anastomosis is spatially regulated by Flt1 during angiogenesis. *Development  
1185 (Cambridge, England)*, 144(5), 889–896. <https://doi.org/10.1242/dev.145672>
- 1186 Neto, F., Klaus-Bergmann, A., Ong, Y. T., Alt, S., Vion, A.-C., Szymborska, A.,  
1187 Carvalho, J. R., Hollfinger, I., Bartels-Klein, E., Franco, C. A., et al. (2018). YAP  
1188 and TAZ regulate adherens junction dynamics and endothelial cell distribution  
1189 during vascular development. *ELife*, 7. <https://doi.org/10.7554/eLife.31037>
- 1190 Olive, M., Harten, I., Mitchell, R., Beers, J. K., Djabali, K., Cao, K., Erdos, M. R., Blair,  
1191 C., Funke, B., Smoot, L., et al. (2010). Cardiovascular pathology in Hutchinson-  
1192 Gilford progeria: correlation with the vascular pathology of aging. *Arteriosclerosis,  
1193 Thrombosis, and Vascular Biology*, 30(11), 2301–2309.  
1194 <https://doi.org/10.1161/ATVBAHA.110.209460>

- 1195 Osmanagic-Myers, S., Kiss, A., Manakanatas, C., Hamza, O., Sedlmayer, F., Szabo, P.  
1196 L., Fischer, I., Fichtinger, P., Podesser, B. K., Eriksson, M., et al. (2019).  
1197 Endothelial progerin expression causes cardiovascular pathology through an  
1198 impaired mechanoresponse. *The Journal of Clinical Investigation*, *129*(2), 531–545.  
1199 <https://doi.org/10.1172/JCI121297>
- 1200 Ostlund, C., Folker, E. S., Choi, J. C., Gomes, E. R., Gundersen, G. G., & Worman, H.  
1201 J. (2009). Dynamics and molecular interactions of linker of nucleoskeleton and  
1202 cytoskeleton (LINC) complex proteins. *Journal of Cell Science*, *122*(Pt 22), 4099–  
1203 4108. <https://doi.org/10.1242/jcs.057075>
- 1204 Padmakumar, V. C., Libotte, T., Lu, W., Zaim, H., Abraham, S., Noegel, A. A.,  
1205 Gotzmann, J., Foisner, R., & Karakesisoglou, I. (2005). The inner nuclear  
1206 membrane protein Sun1 mediates the anchorage of Nesprin-2 to the nuclear  
1207 envelope. *Journal of Cell Science*, *118*(Pt 15), 3419–3430.  
1208 <https://doi.org/10.1242/jcs.02471>
- 1209 Putri, G. H., Anders, S., Pyl, P. T., Pimanda, J. E., & Zanini, F. (2022). Analysing high-  
1210 throughput sequencing data in Python with HTSeq 2.0. *Bioinformatics* (Oxford,  
1211 England). <https://doi.org/10.1093/bioinformatics/btac166>
- 1212 Rauzi, M., Lenne, P.-F., & Lecuit, T. (2010). Planar polarized actomyosin contractile  
1213 flows control epithelial junction remodelling. *Nature*, *468*(7327), 1110–1114.  
1214 <https://doi.org/10.1038/nature09566>
- 1215 Rho, S.-S., Ando, K., & Fukuhara, S. (2017). Dynamic Regulation of Vascular  
1216 Permeability by Vascular Endothelial Cadherin-Mediated Endothelial Cell-Cell  
1217 Junctions. *Journal of Nippon Medical School = Nippon Ika Daigaku Zasshi*, *84*(4),  
1218 148–159. <https://doi.org/10.1272/jnms.84.148>
- 1219 Ricard, N., Ciais, D., Levet, S., Subileau, M., Mallet, C., Zimmers, T. A., Lee, S.-J.,  
1220 Bidart, M., Feige, J.-J., & Bailly, S. (2012). BMP9 and BMP10 are critical for  
1221 postnatal retinal vascular remodeling. *Blood*, *119*(25), 6162–6171.  
1222 <https://doi.org/10.1182/blood-2012-01-407593>
- 1223 Ruter, D. L., Liu, Z., Ngo, K. M., X, S., Marvin, A., Buglak, D. B., Kidder, E. J., & Bautch,  
1224 V. L. (2021). SMAD6 transduces endothelial cell flow responses required for blood  
1225 vessel homeostasis. *Angiogenesis*, *24*(2), 387–398.  
1226 <https://doi.org/10.1007/s10456-021-09777-7>
- 1227 Sauteur, L., Affolter, M., & Belting, H.-G. (2017). Distinct and redundant functions of  
1228 Esam and VE-cadherin during vascular morphogenesis. *Development*.  
1229 <https://doi.org/10.1242/dev.140038>
- 1230 Sauteur, L., Krudewig, A., Herwig, L., Ehrenfeuchter, N., Lenard, A., Affolter, M., &  
1231 Belting, H.-G. (2014). Cdh5/VE-cadherin Promotes Endothelial Cell Interface  
1232 Elongation via Cortical Actin Polymerization during Angiogenic Sprouting. *Cell*  
1233 *Reports*, *9*(2), 504–513. <https://doi.org/10.1016/j.celrep.2014.09.024>
- 1234 Schindelin, J., Arganda-Carreras, I., Frise, E., Kaynig, V., Longair, M., Pietzsch, T.,

- 1235 Preibisch, S., Rueden, C., Saalfeld, S., Schmid, B., et al. (2012). Fiji: an open-  
1236 source platform for biological-image analysis. *Nature Methods*, 9(7), 676–682.  
1237 <https://doi.org/10.1038/nmeth.2019>
- 1238 Seebach, J., Dieterich, P., Luo, F., Schillers, H., Vestweber, D., Oberleithner, H., Galla,  
1239 H. J., & Schnittler, H. J. (2000). Endothelial barrier function under laminar fluid  
1240 shear stress. *Laboratory Investigation; a Journal of Technical Methods and*  
1241 *Pathology*, 80(12), 1819–1831. <https://doi.org/10.1038/labinvest.3780193>
- 1242 Sehrawat, S., Cullere, X., Patel, S., Italiano, J., & Mayadas, T. N. (2008). Role of Epac1,  
1243 an exchange factor for Rap GTPases, in endothelial microtubule dynamics and  
1244 barrier function. *Molecular Biology of the Cell*, 19(3), 1261–1270.  
1245 <https://doi.org/10.1091/mbc.e06-10-0972>
- 1246 Sehrawat, S., Hernandez, T., Cullere, X., Takahashi, M., Ono, Y., Komarova, Y., &  
1247 Mayadas, T. N. (2011). AKAP9 regulation of microtubule dynamics promotes  
1248 Epac1-induced endothelial barrier properties. *Blood*, 117(2), 708–718.  
1249 <https://doi.org/10.1182/blood-2010-02-268870>
- 1250 Shaw, R. M., Fay, A. J., Puthenveedu, M. A., von Zastrow, M., Jan, Y.-N., & Jan, L. Y.  
1251 (2007). Microtubule plus-end-tracking proteins target gap junctions directly from the  
1252 cell interior to adherens junctions. *Cell*, 128(3), 547–560.  
1253 <https://doi.org/10.1016/j.cell.2006.12.037>
- 1254 Sörensen, I., Adams, R. H., & Gossler, A. (2009). DLL1-mediated Notch activation  
1255 regulates endothelial identity in mouse fetal arteries. *Blood*, 113(22), 5680–5688.  
1256 <https://doi.org/10.1182/blood-2008-08-174508>
- 1257 Starr, D. A., & Fridolfsson, H. N. (2010). Interactions between nuclei and the  
1258 cytoskeleton are mediated by SUN-KASH nuclear-envelope bridges. *Annual*  
1259 *Review of Cell and Developmental Biology*, 26, 421–444.  
1260 <https://doi.org/10.1146/annurev-cellbio-100109-104037>
- 1261 Stehbens, S. J., Paterson, A. D., Crampton, M. S., Shewan, A. M., Ferguson, C.,  
1262 Akhmanova, A., Parton, R. G., & Yap, A. S. (2006). Dynamic microtubules regulate  
1263 the local concentration of E-cadherin at cell-cell contacts. *Journal of Cell Science*,  
1264 119(Pt 9), 1801–1811. <https://doi.org/10.1242/jcs.02903>
- 1265 Stewart-Hutchinson, P. J., Hale, C. M., Wirtz, D., & Hodzic, D. (2008). Structural  
1266 requirements for the assembly of LINC complexes and their function in cellular  
1267 mechanical stiffness. *Experimental Cell Research*, 314(8), 1892–1905.  
1268 <https://doi.org/10.1016/j.yexcr.2008.02.022>
- 1269 Stewart, R. M., Zubek, A. E., Rosowski, K. A., Schreiner, S. M., Horsley, V., & King, M.  
1270 C. (2015). Nuclear-cytoskeletal linkages facilitate cross talk between the nucleus  
1271 and intercellular adhesions. *The Journal of Cell Biology*, 209(3), 403–418.  
1272 <https://doi.org/10.1083/jcb.201502024>
- 1273 Stroud, M. J., Feng, W., Zhang, J., Veevers, J., Fang, X., Gerace, L., & Chen, J. (2017).  
1274 Nesprin 1α2 is essential for mouse postnatal viability and nuclear positioning in



- 1275 skeletal muscle. *The Journal of Cell Biology*, 216(7), 1915–1924.  
1276 <https://doi.org/10.1083/jcb.201612128>
- 1277 Szyborska, A., & Gerhardt, H. (2018). Hold Me, but Not Too Tight-Endothelial Cell-  
1278 Cell Junctions in Angiogenesis. *Cold Spring Harbor Perspectives in Biology*, 10(8).  
1279 <https://doi.org/10.1101/cshperspect.a029223>
- 1280 Taranum, S., Sur, I., Müller, R., Lu, W., Rashmi, R. N., Munck, M., Neumann, S.,  
1281 Karakesisoglou, I., & Noegel, A. A. (2012). Cytoskeletal interactions at the nuclear  
1282 envelope mediated by nesprins. *International Journal of Cell Biology*, 2012,  
1283 736524. <https://doi.org/10.1155/2012/736524>
- 1284 Thakar, K., May, C. K., Rogers, A., & Carroll, C. W. (2017). Opposing roles for distinct  
1285 LINC complexes in regulation of the small GTPase RhoA. *Molecular Biology of the*  
1286 *Cell*, 28(1), 182–191. <https://doi.org/10.1091/mbc.E16-06-0467>
- 1287 Tkachenko, E., Gutierrez, E., Saikin, S. K., Fogelstrand, P., Kim, C., Groisman, A., &  
1288 Ginsberg, M. H. (2013). The nucleus of endothelial cell as a sensor of blood flow  
1289 direction. *Biology Open*, 2(10), 1007–1012. <https://doi.org/10.1242/bio.20134622>
- 1290 Ueda, N., Maekawa, M., Matsui, T. S., Deguchi, S., Takata, T., Katahira, J.,  
1291 Higashiyama, S., & Hieda, M. (2022). Inner Nuclear Membrane Protein, SUN1, is  
1292 Required for Cytoskeletal Force Generation and Focal Adhesion Maturation.  
1293 *Frontiers in Cell and Developmental Biology*, 10, 885859.  
1294 <https://doi.org/10.3389/fcell.2022.885859>
- 1295 van Ingen, M. J. A., & Kirby, T. J. (2021). LINCing Nuclear Mechanobiology With  
1296 Skeletal Muscle Mass and Function. *Frontiers in Cell and Developmental Biology*,  
1297 9, 690577. <https://doi.org/10.3389/fcell.2021.690577>
- 1298 Vasileva, E., & Citi, S. (2018). The role of microtubules in the regulation of epithelial  
1299 junctions. *Tissue Barriers*, 6(3), 1539596.  
1300 <https://doi.org/10.1080/21688370.2018.1539596>
- 1301 Verin, A. D., Birukova, A., Wang, P., Liu, F., Becker, P., Birukov, K., & Garcia, J. G.  
1302 (2001). Microtubule disassembly increases endothelial cell barrier dysfunction: role  
1303 of MLC phosphorylation. *American Journal of Physiology. Lung Cellular and*  
1304 *Molecular Physiology*, 281(3), L565-74.  
1305 <https://doi.org/10.1152/ajplung.2001.281.3.L565>
- 1306 Vion, A.-C., Perovic, T., Petit, C., Hollfinger, I., Bartels-Klein, E., Frampton, E., Gordon,  
1307 E., Claesson-Welsh, L., & Gerhardt, H. (2020). Endothelial Cell Orientation and  
1308 Polarity Are Controlled by Shear Stress and VEGF Through Distinct Signaling  
1309 Pathways. *Frontiers in Physiology*, 11, 623769.  
1310 <https://doi.org/10.3389/fphys.2020.623769>
- 1311 Wacker, A., & Gerhardt, H. (2011). Endothelial development taking shape. *Current*  
1312 *Opinion in Cell Biology*, 23(6), 676–685. <https://doi.org/10.1016/j.ceb.2011.10.002>
- 1313 Wimmer, R., Cseh, B., Maier, B., Scherrer, K., & Baccharini, M. (2012). Angiogenic

- 1314 sprouting requires the fine tuning of endothelial cell cohesion by the Raf-1/Rok- $\alpha$   
1315 complex. *Developmental Cell*, 22(1), 158–171.  
1316 <https://doi.org/10.1016/j.devcel.2011.11.012>
- 1317 Wright, C. E., Kushner, E. J., Du, Q., & Bautch, V. L. (2015). LGN directs interphase  
1318 endothelial cell behavior via the microtubule network. *PLoS ONE*, 10(9), 1–15.  
1319 <https://doi.org/10.1371/journal.pone.0138763>
- 1320 Wylie, L. A., Mouillesseaux, K. P., Chong, D. C., & Bautch, V. L. (2018). Developmental  
1321 SMAD6 loss leads to blood vessel hemorrhage and disrupted endothelial cell  
1322 junctions. *Developmental Biology*, 442(2), 199–209.  
1323 <https://doi.org/10.1016/j.ydbio.2018.07.027>
- 1324 Yang, F., Zhang, Y., Zhu, J., Wang, J., Jiang, Z., Zhao, C., Yang, Q., Huang, Y., Yao,  
1325 W., Pang, W., et al. (2020). Laminar Flow Protects Vascular Endothelial Tight  
1326 Junctions and Barrier Function via Maintaining the Expression of Long Non-coding  
1327 RNA MALAT1. *Frontiers in Bioengineering and Biotechnology*, 8, 647.  
1328 <https://doi.org/10.3389/fbioe.2020.00647>
- 1329 Zhang, J., Felder, A., Liu, Y., Guo, L. T., Lange, S., Dalton, N. D., Gu, Y., Peterson, K.  
1330 L., Mizisin, A. P., Shelton, G. D., et al. (2010). Nesprin 1 is critical for nuclear  
1331 positioning and anchorage. *Human Molecular Genetics*, 19(2), 329–341.  
1332 <https://doi.org/10.1093/hmg/ddp499>
- 1333 Zhang, Q., Ragnauth, C. D., Skepper, J. N., Worth, N. F., Warren, D. T., Roberts, R. G.,  
1334 Weissberg, P. L., Ellis, J. A., & Shanahan, C. M. (2005). Nesprin-2 is a multi-  
1335 isomeric protein that binds lamin and emerin at the nuclear envelope and forms a  
1336 subcellular network in skeletal muscle. *Journal of Cell Science*, 118(Pt 4), 673–687.  
1337 <https://doi.org/10.1242/jcs.01642>
- 1338 Zhang, X., Lei, K., Yuan, X., Wu, X., Zhuang, Y., Xu, T., Xu, R., & Han, M. (2009).  
1339 SUN1/2 and Syne/Nesprin-1/2 complexes connect centrosome to the nucleus  
1340 during neurogenesis and neuronal migration in mice. *Neuron*, 64(2), 173–187.  
1341 <https://doi.org/10.1016/j.neuron.2009.08.018>
- 1342 Zhou, C., Li, C., Zhou, B., Sun, H., Koullourou, V., Holt, I., Puckelwartz, M. J., Warren,  
1343 D. T., Hayward, R., Lin, Z., et al. (2017). Novel nesprin-1 mutations associated with  
1344 dilated cardiomyopathy cause nuclear envelope disruption and defects in  
1345 myogenesis. *Human Molecular Genetics*, 26(12), 2258–2276.  
1346 <https://doi.org/10.1093/hmg/ddx116>
- 1347 Zhu, R., Antoku, S., & Gundersen, G. G. (2017). Centrifugal Displacement of Nuclei  
1348 Reveals Multiple LINC Complex Mechanisms for Homeostatic Nuclear Positioning.  
1349 *Current Biology : CB*, 27(20), 3097-3110.e5.  
1350 <https://doi.org/10.1016/j.cub.2017.08.073>
- 1351

1352 **FIGURE LEGENDS**

1353 **Figure 1. The nuclear LINC protein SUN1 regulates vascular development.**

1354 **(a)** Schematic of tamoxifen-induced excision of exon 4 of *Sun1* in pups from cross of  
1355 *Sun1<sup>fl/fl</sup>* X *Sun1<sup>fl/+</sup>;Cdh5CreERT2* mice. **(b)** Representative images of P7 mouse retinas  
1356 of indicated genotypes, stained for IB4 (isolectin). Scale bar, 500 $\mu$ m. Inset shows  
1357 vascular plexus ahead of vein. Red line shows expansion of vascular front. Scale bar  
1358 inset, 150 $\mu$ m. **(c)** Quantification of vessel network radial expansion in **b**. n=186 ROIs  
1359 from 44 retinas (controls) and 63 ROIs from 16 retinas (*Sun1<sup>IECKO</sup>*) from 6 independent  
1360 litters. \*\*\*\*,  $p < 0.0001$  by student's two-tailed unpaired *t*-test. **(d)** Quantification of  
1361 vascular density ahead of either arteries or veins. n=87 ROIs (controls, artery), 38 ROIs  
1362 (*Sun1<sup>IECKO</sup>*, artery), 84 ROIs (controls, vein), and 37 ROIs (*Sun1<sup>IECKO</sup>*, vein) from 27  
1363 retinas (controls) and 12 retinas (*Sun1<sup>IECKO</sup>*) from 3 independent litters. \*\*,  $p < 0.01$  by  
1364 student's two-tailed unpaired *t*-test. **(e)** Representative images of IB4 (isolectin) (green,  
1365 vessels) and VE-cadherin (white, junctions) staining in P7 retinas of indicated  
1366 genotypes. Scale bar, 50 $\mu$ m. **(f)** Quantification of ectopic VE-cadherin as shown in **e**.  
1367 n=144 junctions (9 retinas, controls) and 160 junctions (10 retinas, *Sun1<sup>IECKO</sup>*). \*\*\*\*,  
1368  $p < 0.0001$  by student's two-tailed unpaired *t*-test.

1369

1370 **Figure 2. Nuclear SUN1 is required for sprouting angiogenesis.**

1371 **(a)** Representative images of HUVEC with indicated siRNAs in 3D angiogenic sprouting  
1372 assay. Sprouts were stained for Phalloidin (actin) and then depth encoded such that  
1373 cooler colors are further in the Z-plane and warmer colors are closer in the Z-plane.  
1374 Scale bar, 100 $\mu$ m. **(b)** Quantification of average sprout length of 3D angiogenic sprouts  
1375 shown in **a**. n=42 beads (NT) and 43 beads (SUN1 KD) compiled from 5 replicates. \*\*\*\*,  
1376  $p < 0.0001$  by student's two-tailed unpaired *t*-test. **(c)** Quantification of branches/mm of

1377 3D angiogenic sprouts shown in **a**. n=41 beads (NT) and 43 beads (SUN1 KD) compiled  
1378 from 5 replicates. \*\*\*\*,  $p < 0.0001$  by student's two-tailed unpaired *t*-test. **(d)** Stills from  
1379 Movie S1 and Movie S2 showing sprouting dynamics of HUVEC with indicated siRNAs  
1380 over 50h. Scale bar, 50 $\mu$ m. **(e)** Quantification of HUVEC sprout extensions and  
1381 retractions shown in **d**. n=101 sprouts (NT) and 77 sprouts (SUN1 KD) compiled from 3  
1382 replicates.  $p < 0.001$  by  $\chi^2$  analysis. **(f)** Representative images of HUVEC with indicated  
1383 siRNAs and stained with indicated antibodies in the 3D sprouting angiogenesis assay.  
1384 Endothelial cells were stained for DAPI (cyan, DNA), phalloidin (green, actin), and VE-  
1385 cadherin (white, junctions). Arrows indicate normal junctions; arrowheads indicate  
1386 abnormal junctions. Scale bar, 20 $\mu$ m. **(g)** Quantification of ectopic VE-cadherin as  
1387 shown in **f**. n=32 junctions (NT) and 30 junctions (SUN1 KD) compiled from 2 replicates.  
1388 \*\*\*\*,  $p < 0.0001$  by student's two-tailed unpaired *t*-test.

1389

1390 **Figure 3. SUN1 regulates actin dynamics and angiogenic sprout extension *in***  
1391 ***vivo*.**

1392 **(a)** Representative images of zebrafish embryos at 34 hpf with indicated morpholino  
1393 treatments; anterior to left. *Tg(fli:LifeAct-GFP)* (green, vessels). Insets show ISVs with  
1394 filopodia, outlines highlighted to show filopodia. Scale bar, 20 $\mu$ m. **(b)** Quantification of  
1395 filopodia number shown in **a**. n=39 ROIs (15 fish, NT) and 56 ROIs (20 fish, *sun1b* MO)  
1396 compiled from 3 replicates. \*\*,  $p < 0.01$  by student's two-tailed unpaired *t*-test. **(c)**  
1397 Quantification of average filopodia length shown in **a**. n=39 ROIs (15 fish, NT MO) and  
1398 56 ROIs (20 fish, *sun1b* MO) compiled from 3 replicates. \*\*\*\*,  $p < 0.0001$  by student's  
1399 two-tailed unpaired *t*-test. **(d)** Representative images of zebrafish embryos at 34 hpf  
1400 with indicated genotypes; anterior to left. *Tg(fli:LifeAct-GFP)* (green, vessels). Insets  
1401 show ISVs with filopodia, outlines highlighted to show filopodia. Scale bar, 20 $\mu$ m. **(e)**

1402 Quantification of filopodia number shown in **d**. n=27 ROIs (9 fish, *sun1b*<sup>+/+</sup>) and 30 ROIs  
1403 (10 fish, *sun1b*<sup>sa33109</sup>) compiled from 2 replicates. ns, not significant by student's two-  
1404 tailed unpaired *t*-test. **(f)** Quantification of average filopodia length shown in **d**. n=27  
1405 ROIs (9 fish, *sun1b*<sup>+/+</sup>) and 30 ROIs (10 fish, *sun1b*<sup>sa33109</sup>) compiled from 2 replicates.  
1406 \*\*, *p*<0.01 by student's two-tailed unpaired *t*-test. **(g)** Stills from Movie S3 and Movie S4  
1407 showing ISV sprouting from 26 hpf to 36 hpf in zebrafish embryos with indicated  
1408 morpholino treatment; anterior to left. *Tg(fli:LifeAct-GFP)* (green, vessels). White  
1409 arrowhead points to ISV that does not extend or connect to DLAV. Yellow arrow points  
1410 to ISV that extends but does not connect to DLAV. Scale bar, 20µm. **(h)** Quantification  
1411 of ISV connection to DLAV shown in **g**. n=32 ISVs (6 fish, NT MO) and 36 ISVs (6 fish,  
1412 *sun1b* MO) compiled from 2 replicates. *p*<0.05 by  $\chi^2$  analysis. **(i)** Representative images  
1413 of zebrafish embryos at 34 hpf with indicated morpholino treatments; anterior to left.  
1414 *Tg(fli:LifeAct-GFP)* (green, vessels); ZO-1 (white junctions). Outlines highlighted to  
1415 show junction shapes. Scale bar, 10µm. **(j)** Quantification of junction morphology shown  
1416 in **i**. n=136 junctions (21 fish, NT MO) and 142 junctions (22 fish, *sun1b* MO). \*\*\*,  
1417 *p*<0.001 by student's two-tailed unpaired *t*-test.

1418

1419 **Figure 4. SUN1 stabilizes endothelial cell-cell junctions and regulates barrier**  
1420 **function.**

1421 **(a)** Representative images of HUVEC with indicated knockdowns in monolayers.  
1422 Endothelial cells were stained for DAPI (cyan, DNA) and VE-cadherin (white, junctions).  
1423 Insets show junctions. Scale bar, 10µm. **(b)** Representative graph of impedance  
1424 measured by RTCA. **(c)** Quantification of % change in cell index for RTCA measured at  
1425 5h. Normalized to NT cell index. n=5 replicates. \*, *p*<0.05 by student's two-tailed  
1426 unpaired *t*-test. **(d)** Representative images of HUVEC with indicated siRNAs plated on

1427 biotinylated fibronectin and exposed to 15 dyn/cm<sup>2</sup> shear stress for 72 h then treated  
1428 with streptavidin. Endothelial cells were stained for DAPI (cyan, DNA), streptavidin  
1429 (green), and VE-cadherin (white, junctions). Arrow indicates flow direction. Insets show  
1430 junctions. Scale bar, 20µm. **(e)** Quantification of cell alignment shown in **d**. n=59 cells  
1431 (NT) and 73 cells (SUN1 KD) compiled from 3 replicates. **(f)** Quantification of  
1432 streptavidin area shown in **d**. n=15 ROIs (NT) and 15 ROIS (SUN1 KD) compiled from 3  
1433 replicates. **(g)** Representative images of HUVEC with indicated siRNAs showing  
1434 adherens following EDTA washout. Endothelial cells were stained for DAPI (cyan, DNA)  
1435 and VE-cadherin (white, junctions). Insets show junctions. Scale bar, 20µm. **(h)**  
1436 Quantification of VE-cadherin line scans at 20 min, 40 min, and 60 min post EDTA  
1437 washout in **g**. 20 min: n=31 junctions (NT) and 23 junctions (SUN1 KD); 40 min: n=49  
1438 junctions (NT) and 33 junctions (SUN1 KD); 60 min: n=33 junctions (NT) and 33  
1439 junctions (SUN1 KD) compiled from 3 replicates. ns, not significant; \*\*\*\*,  $p < 0.0001$  by  
1440 student's two-tailed unpaired *t*-test.

1441

1442 **Figure 5. SUN1 regulates microtubule localization and dynamics in endothelial**  
1443 **cells.**

1444 **(a)** Representative images of HUVEC with indicated siRNAs and indicated treatments.  
1445 Endothelial cells were stained for DAPI (cyan, DNA) and VE-cadherin (white, junctions).  
1446 Insets show junctions. Scale bar, 20µm. **(b)** Quantification of VE-cadherin line scans for  
1447 treatments shown in **a**. n=106 junctions (NT, vehicle), 101 junctions (NT, Nocodazole),  
1448 105 junctions (SUN1 KD, vehicle), and 96 junctions (SUN1 KD, Nocodazole) compiled  
1449 from 3 replicates. ns, not significant; \*\*\*\*,  $p < 0.0001$  by two-way ANOVA with Tukey's  
1450 multiple comparisons test. **(c)** Representative images of HUVEC with indicated siRNAs.  
1451 Endothelial cells were stained for α-tubulin (cyan, microtubules) and VE-cadherin (red,



1452 junctions). Red insets show  $\alpha$ -tubulin at the MTOC (microtubule organizing center),  
1453 yellow insets show  $\alpha$ -tubulin contacts at junctions. Scale bar, 20 $\mu$ m. **(d)** Quantification of  
1454  $\alpha$ -tubulin area at the MTOC shown in **c**. n=19 cells (NT) and 10 cells (SUN1 KD)  
1455 compiled from 3 replicates. ns, not significant by student's two-tailed unpaired *t*-test. **(e)**  
1456 Quantification of peripheral  $\alpha$ -tubulin area shown in **c**. n=39 cells (NT) and 46 cells  
1457 (SUN1 KD) compiled from 3 replicates. \*\*\*\*,  $p<0.0001$  by student's two-tailed unpaired  
1458 *t*-test. **(f)** Quantification of contacts between  $\alpha$ -tubulin and VE-cadherin shown in **c**.  
1459 n=75 junctions (NT) and 48 junctions (SUN1 KD) compiled from 3 replicates. \*\*\*,  
1460  $p<0.001$  by student's two-tailed unpaired *t*-test. **(g)** Stills from Movie S5 and Movie S6  
1461 showing microtubule growth in EB3-mCherry labeled HUVEC. White dot indicates start  
1462 of track. Yellow line indicates growth, red line indicates shrinkage. Scale bar, 10 $\mu$ m. **(h)**  
1463 Quantification of microtubule growth rate from EB3-mCherry microtubule tracking.  
1464 N=120 microtubules (12 cells, NT) and 117 microtubules (12 cells, SUN1 KD) compiled  
1465 from 2 replicates. ns, not significant by student's two-tailed unpaired *t*-test. **(i)**  
1466 Quantification of microtubule shrink rate from EB3-mCherry microtubule tracking. n=120  
1467 microtubules (12 cells, NT) and 117 microtubules (12 cells, SUN1 KD) compiled from 2  
1468 replicates. \*\*,  $p<0.01$  by student's two-tailed unpaired *t*-test. **(j)** Quantification of  
1469 catastrophe rate from EB3-mCherry microtubule tracking. n=120 microtubules (12 cells,  
1470 NT) and 117 microtubules (12 cells, SUN1 KD) compiled from 2 replicates. \*\*\*\*,  
1471  $p<0.0001$  by student's two-tailed unpaired *t*-test. **(k)** Quantification of percent of time  
1472 spent shrinking from EB3-mCherry microtubule tracking. n=120 microtubules (12 cells,  
1473 NT) and 117 microtubules (12 cells, SUN1 KD) compiled from 2 replicates. \*\*\*\*,  
1474  $p<0.0001$  by student's two-tailed unpaired *t*-test.

1475

1476 **Figure 6. SUN1 regulates endothelial cell contractility and exerts its effects on**  
1477 **junctions through the microtubule-associated GEF-H1.**

1478 **(a)** Representative images of HUVEC with indicated siRNAs and indicated treatments.  
1479 Endothelial cells were stained for DAPI (cyan, DNA) and VE-cadherin (white, junctions).  
1480 Insets show junctions. Scale bar, 20 $\mu$ m. **(b)** Quantification of VE-cadherin line scans for  
1481 treatments shown in **a**. n=159 junctions (NT, vehicle), 154 junctions (NT, blebbistatin),  
1482 151 junctions (SUN1 KD, vehicle), and 149 junctions (SUN1 KD, blebbistatin) compiled  
1483 from 3 replicates. ns, not significant; \*\*\*\*,  $p < 0.0001$  by two-way ANOVA with Tukey's  
1484 multiple comparisons test. **(c)** Representative images of HUVEC with indicated siRNAs  
1485 and indicated treatments. Endothelial cells were stained for DAPI (cyan, DNA) and VE-  
1486 cadherin (white, junctions). Insets show junctions. Scale bar, 20 $\mu$ m. **(d)** Quantification of  
1487 VE-cadherin line scans for treatments shown in **c**. n=75 junctions (NT, vehicle), 70  
1488 junctions (NT, thrombin), 71 junctions (SUN1 KD, vehicle), and 73 junctions (SUN1 KD,  
1489 thrombin) compiled from 3 replicates. ns, not significant; \*\*\*\*,  $p < 0.0001$  by two-way  
1490 ANOVA with Tukey's multiple comparisons test. **(e)** Representative images of HUVEC  
1491 with indicated siRNAs. Endothelial cells were stained for DAPI (blue, DNA),  $\alpha$ -tubulin  
1492 (red, microtubules), and GEF-H1 (cyan). Insets show  $\alpha$ -tubulin and GEF-H1  
1493 colocalization. Scale bar, 20 $\mu$ m. **(f)** Quantification of free GEF-H1 normalized to  $\alpha$ -  
1494 tubulin associated GEF-H1 shown in **e**. n=30 cells (NT) and 30 cells (SUN1 KD)  
1495 compiled from 3 replicates. \*\*,  $p < 0.01$  by student's two-tailed unpaired *t*-test. **(g)**  
1496 Representative images of HUVEC with indicated siRNAs and indicated treatments.  
1497 Endothelial cells were stained for DAPI (cyan, DNA) and VE-cadherin (white, junctions).  
1498 Insets show junctions. Scale bar, 20 $\mu$ m. **(h)** Quantification of VE-cadherin line scans  
1499 from knockdowns shown in **g**. n=169 junctions (NT), 166 junctions (SUN1 KD), 170



1500 junctions (SUN1/GEF-H1 KD) compiled from 3 replicates. ns, not significant; \*\*\*\*,  
1501  $p < 0.0001$  by one-way ANOVA with Tukey's multiple comparisons test.

1502

1503 **Figure 7. SUN1 regulates endothelial cell junctions through nesprin-1.**

1504 **(a)** Representative images of HUVEC with indicated siRNAs cultured on biotinylated  
1505 fibronectin and treated with streptavidin upon confluence. Endothelial cells were stained  
1506 for DAPI (cyan, DNA), Streptavidin (green), and VE-cadherin (white, junctions). Insets  
1507 show junctions. Scale bar, 20 $\mu$ m. **(b)** Quantification of streptavidin area shown in **a**. n=6  
1508 ROIs (NT), 6 ROIs (SUN1 KD), and 6 ROIs (SUN1/Nesprin-1 KD) from 1 representative  
1509 replicate. \*,  $p < 0.05$ ; \*\*\*\*,  $p < 0.0001$  by one-way ANOVA with Tukey's multiple  
1510 comparisons test. **(c)** Model describing proposed role of SUN1 in angiogenic sprouting  
1511 and endothelial cell junction stabilization.

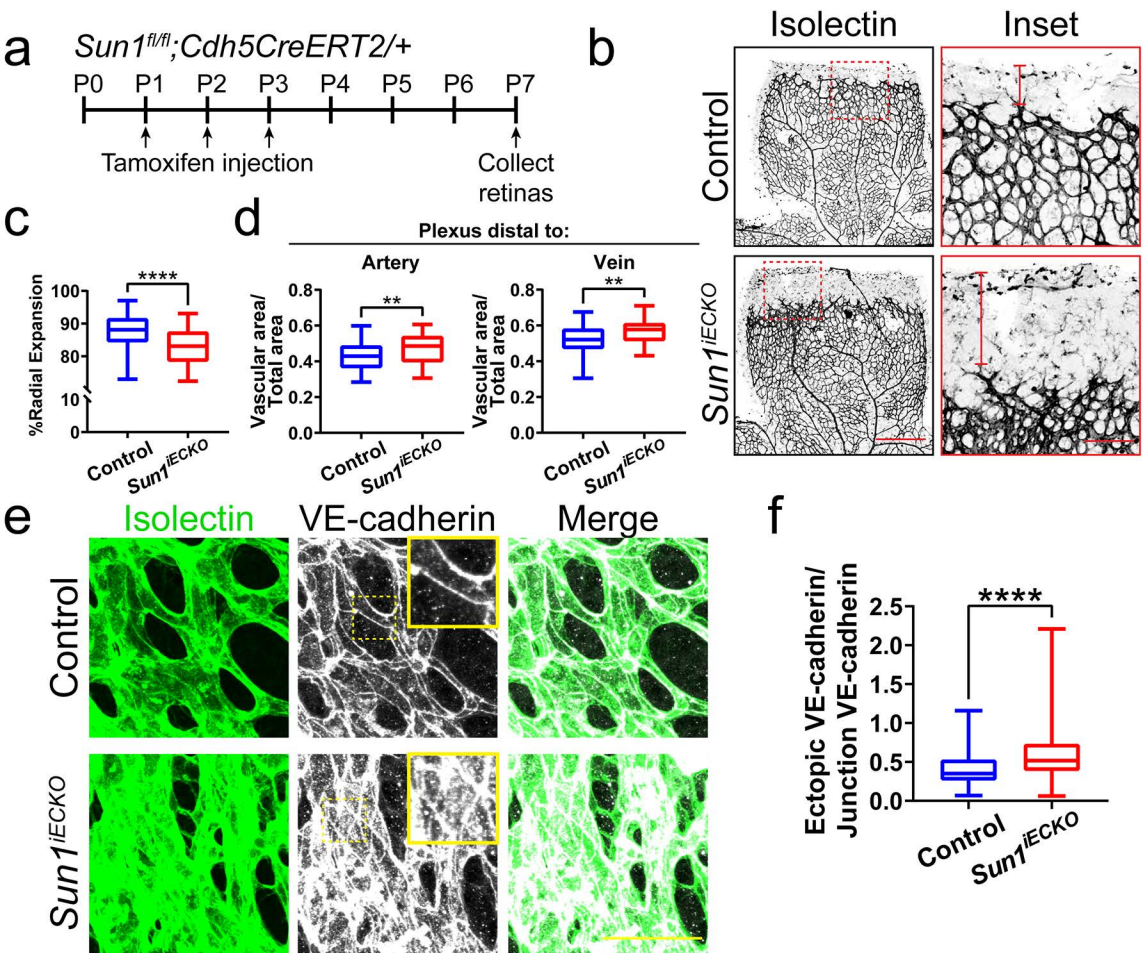

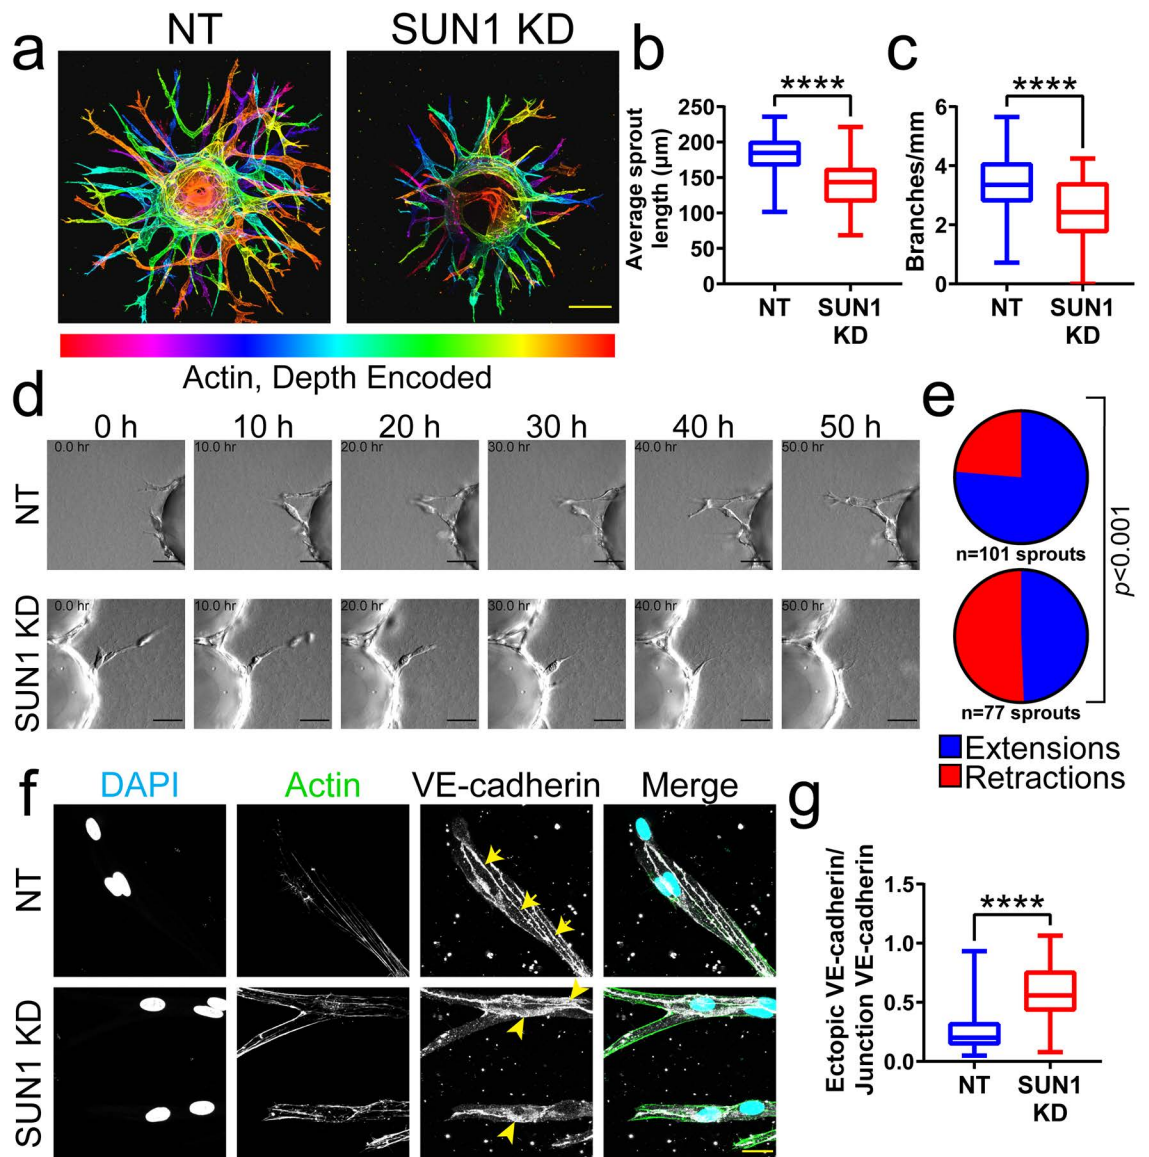

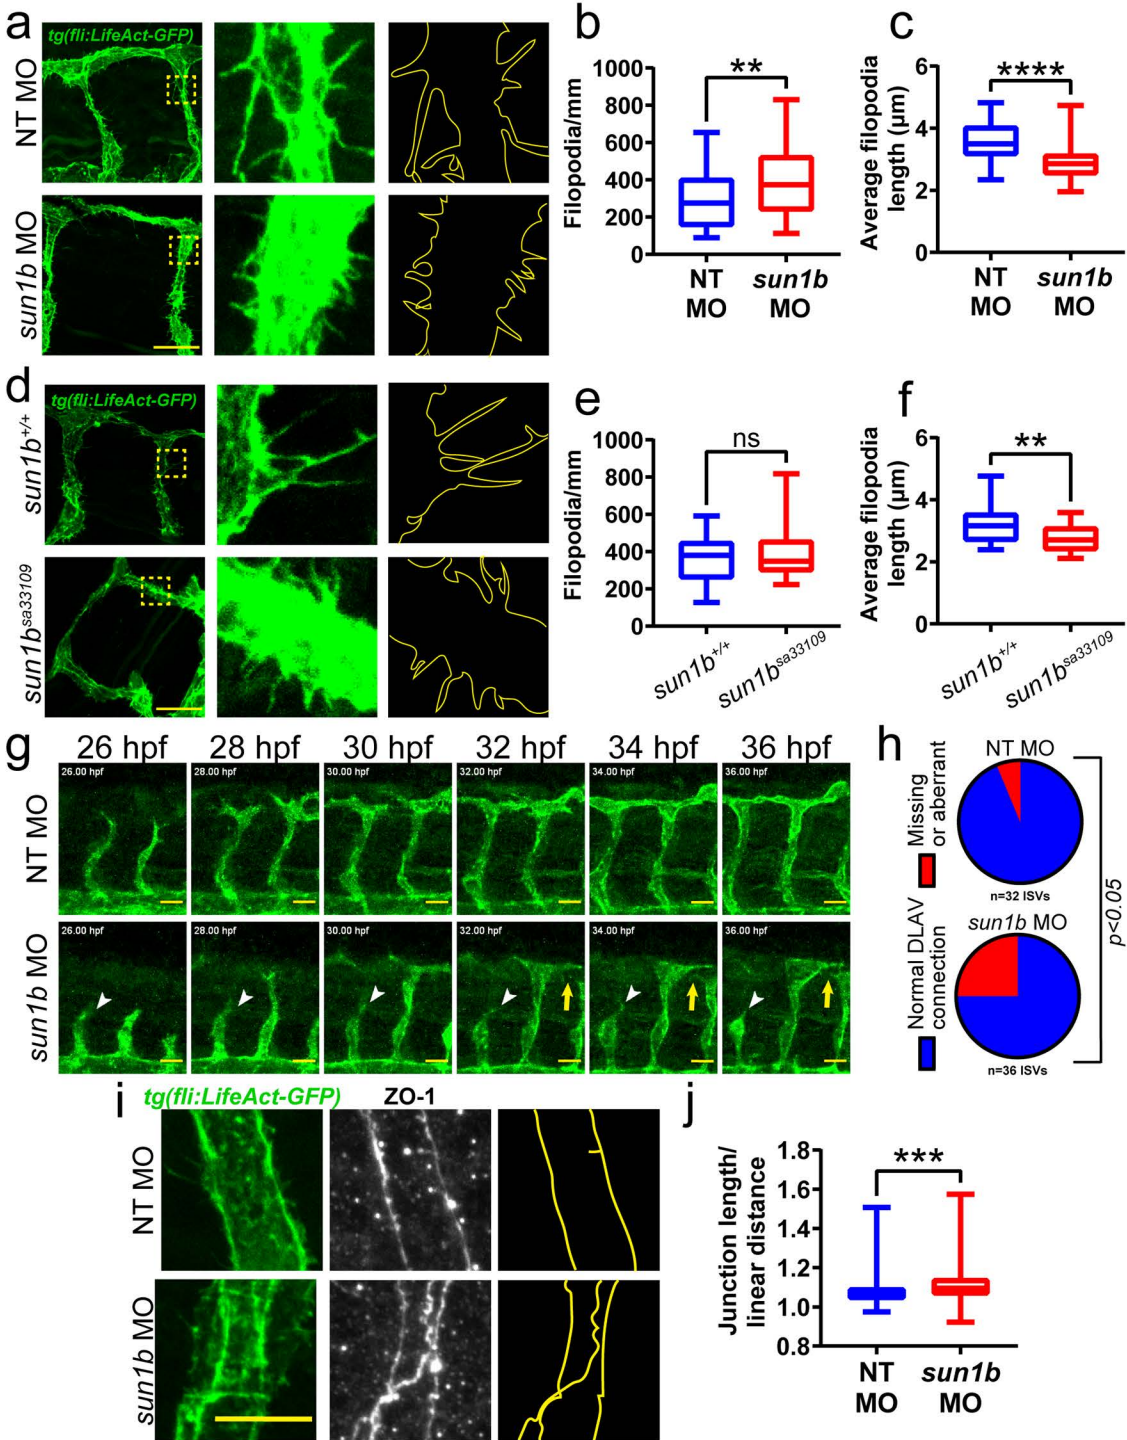



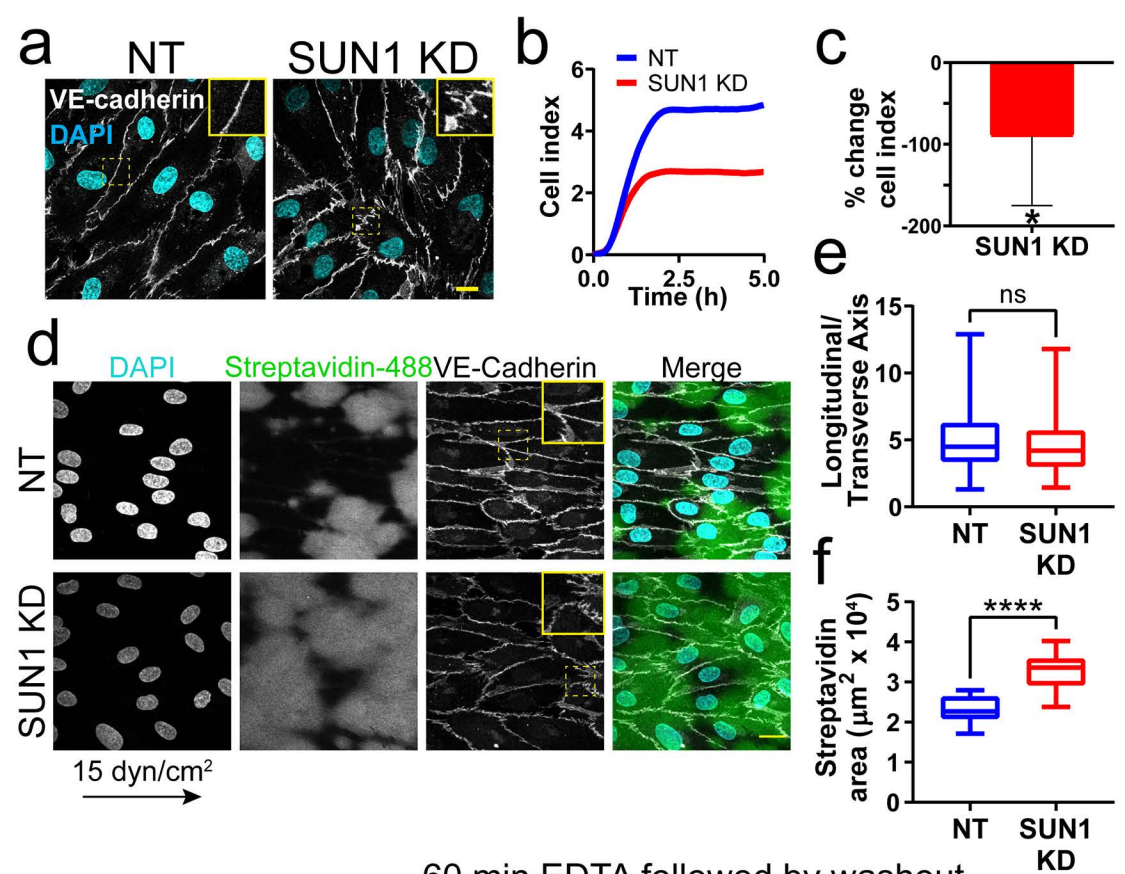

60 min EDTA followed by washout

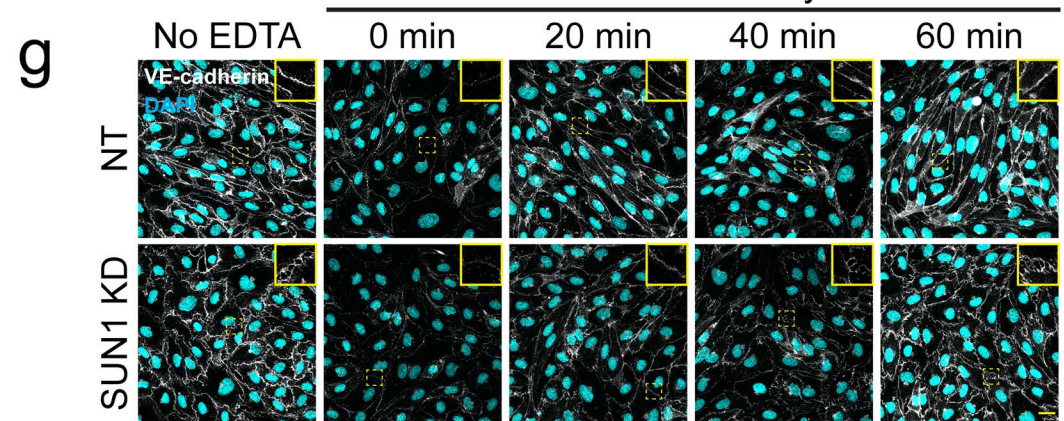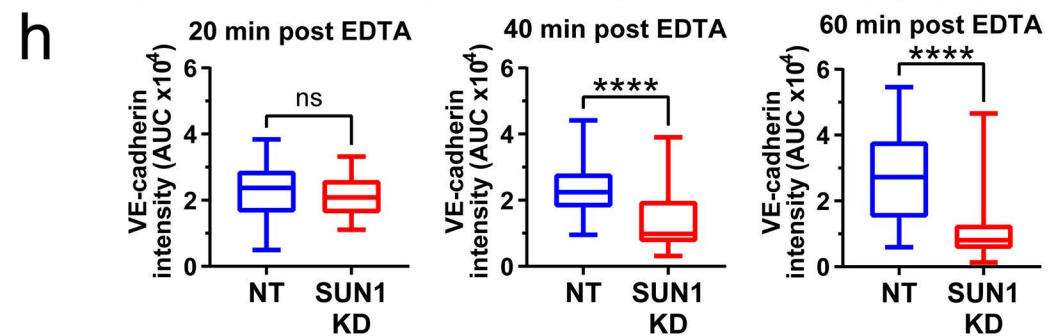

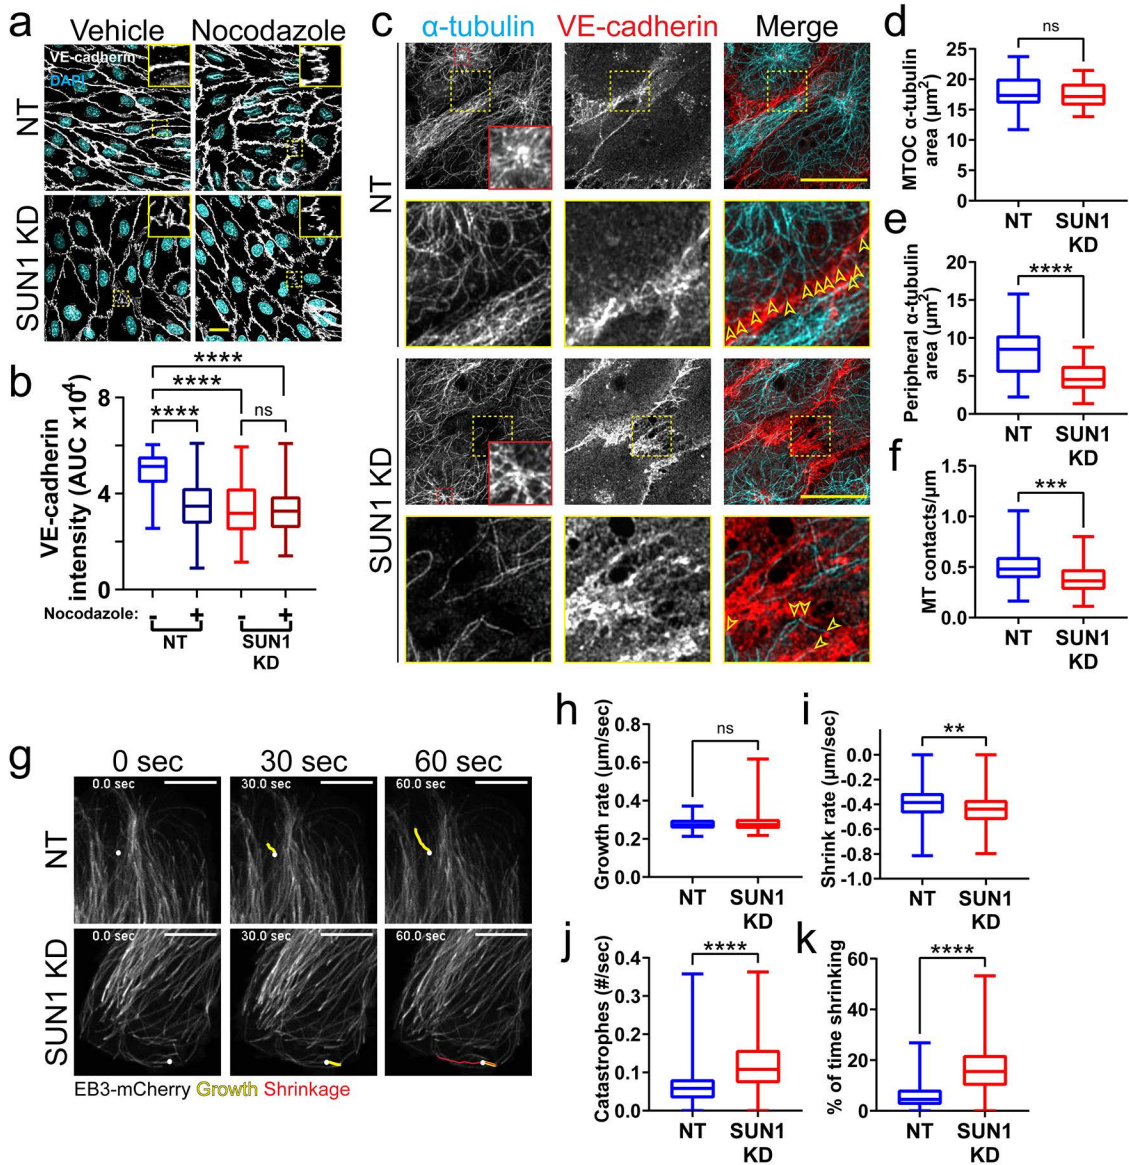



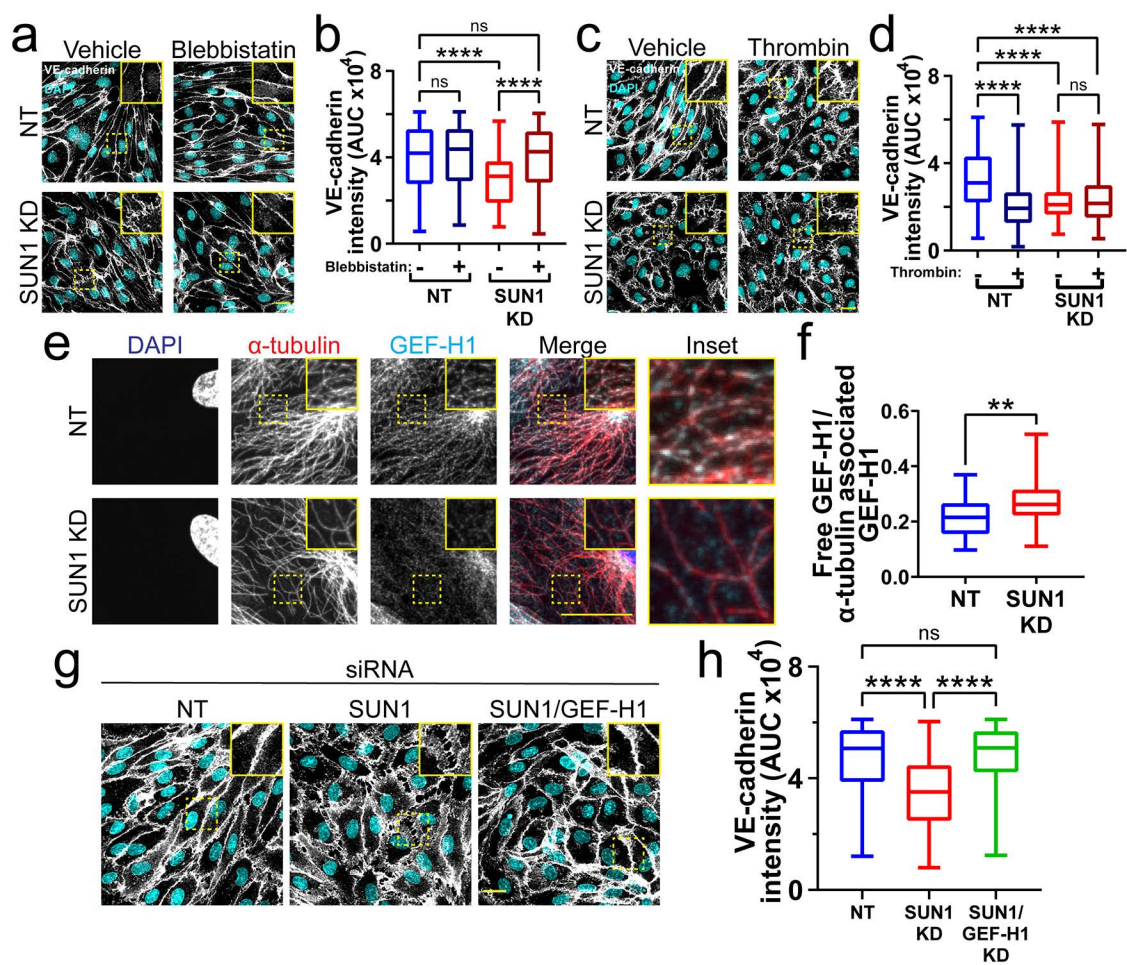

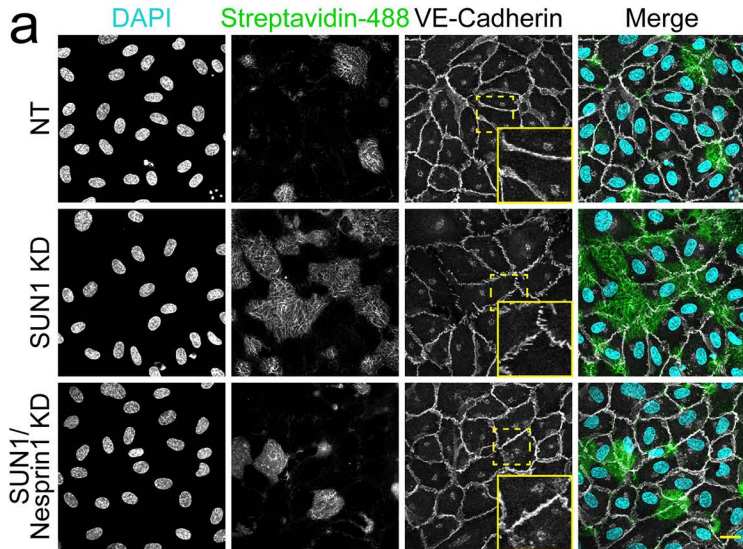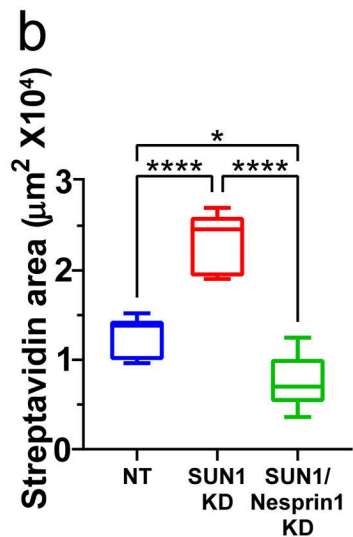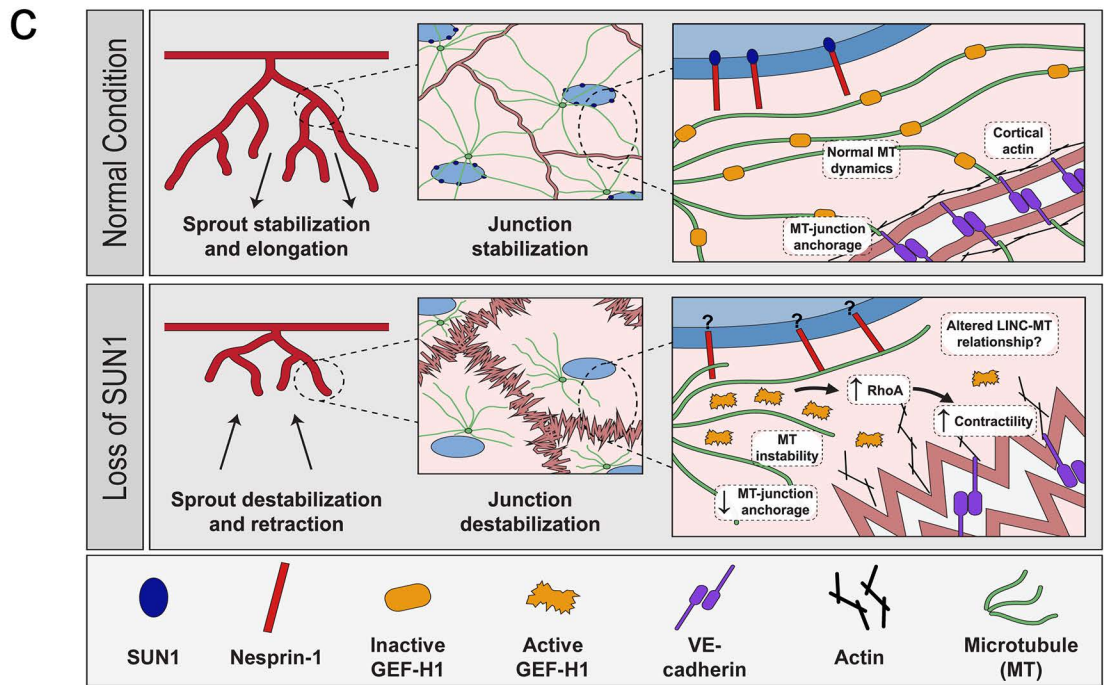



**Table 1. SUN1 depletion does not alter endothelial gene expression.**

| <i>Condition</i>            | <i># Upregulated<br/>DEG</i> | <i># Downregulated<br/>DEG</i> |
|-----------------------------|------------------------------|--------------------------------|
| <i>NT_FLOW vs NT_STAT</i>   | 1323                         | 1109                           |
| <i>SUN1_STAT vs NT_STAT</i> | 0                            | 1                              |
| <i>SUN1_FLOW vs NT_FLOW</i> | 1                            | 1                              |

Abbr: NT, non-targeting; STAT, static; DEG, differentially expressed genes.  
Red numbers indicate that single downregulated gene was *SUN1*.
